# Supplementary material for: Placebo vs Amoxicillin for Nonsevere Fast-Breathing Pneumonia in Malawian Children Aged 2 to 59 Months: A Double-blind, Randomized Clinical Noninferiority Trial
Source: PubMed Central journal article supplement (PMC6583426; doi:10.1001/jamapediatrics.2018.3407), 2018-11-12
Supplement: jamapediatr-173-21-s002.pdf [file jamapediatr-173-21-s002.pdf]

1 **Trial protocol**  
2  
3

4  
5 **Title: Innovative Treatments in Pneumonia (ITIP) 1**  
6

7  
8 **A Study of the Pneumonia Innovations Team**  
9

10 **Subtitle: Double-blind randomized controlled clinical trial of amoxicillin DT versus placebo for fast-**  
11 **breathing childhood pneumonia among children 2-59 months of age in Lilongwe, Malawi**  
12  
13  
14  
15  
16  
17

18  
19 **Sponsored by:**

20  
21 **Save the Children Federation, Inc.**  
22  
23  
24  
25  
26  
27  
28  
29

30  
31 **Version 9.0**  
32 **August 26, 2016**  
33

34 **Confidentiality Statement**  
35

36 **This document is confidential and is to be distributed for review only to investigators, potential**  
37 **investigators, consultants, study staff, applicable regulatory authorities, and applicable independent**  
38 **ethics committees or institutional review boards. The contents of this document shall not be disclosed to**  
39 **others without written authorization from Save the Children (or others, as applicable), unless it is**  
40 **necessary to obtain informed consent from potential study participants.**

**Innovative Treatments in Pneumonia 1**

**TABLE OF CONTENTS**

|    |                                                                           |    |
|----|---------------------------------------------------------------------------|----|
| 41 |                                                                           |    |
| 42 |                                                                           |    |
| 43 |                                                                           |    |
| 44 |                                                                           |    |
| 45 |                                                                           |    |
| 46 |                                                                           |    |
| 47 |                                                                           |    |
| 48 | <a href="#">TABLE OF CONTENTS</a>                                         | 2  |
| 49 | <a href="#">ABBREVIATIONS AND ACRONYMS</a>                                | 4  |
| 50 | <a href="#">INVESTIGATORS</a>                                             | 5  |
| 51 | <a href="#">Eric McCollum, MD</a>                                         | 5  |
| 52 | <a href="#">Assistant Professor, Department of Pediatrics</a>             | 5  |
| 53 | <a href="#">Johns Hopkins School of Medicine</a>                          | 5  |
| 54 | <a href="#">PARTICIPATING INSTITUTIONS</a>                                | 5  |
| 55 | <a href="#">EXECUTIVE SUMMARY</a>                                         | 7  |
| 56 | <a href="#">1 BACKGROUND AND INTRODUCTION</a>                             | 9  |
| 57 | <a href="#">2 RATIONALE</a>                                               | 11 |
| 58 | <a href="#">3 STUDY HYPOTHESIS, OBJECTIVES AND ENDPOINTS</a>              | 11 |
| 59 | <a href="#">□ Study Hypothesis</a>                                        | 11 |
| 60 | <a href="#">□ Study Objectives</a>                                        | 11 |
| 61 | <a href="#">□ Study Endpoints</a>                                         | 12 |
| 62 | <a href="#">4 METHODOLOGY</a>                                             | 12 |
| 63 | <a href="#">4.1 STUDY DESIGN</a>                                          | 12 |
| 64 | <a href="#">4.2 STUDY SITE</a>                                            | 13 |
| 65 | <a href="#">4.3 STUDY POPULATION</a>                                      | 13 |
| 66 | <a href="#">□ Study Population Overview</a>                               | 13 |
| 67 | <a href="#">□ Participant Eligibility</a>                                 | 13 |
| 68 | <a href="#">□ Inclusion Criteria</a>                                      | 14 |
| 69 | <a href="#">□ Exclusion Criteria</a>                                      | 14 |
| 70 | <a href="#">4.4 STUDY PERIOD</a>                                          | 15 |
| 71 | <a href="#">4.5 SAMPLE SIZE</a>                                           | 15 |
| 72 | <a href="#">4.6 STUDY PROCEDURES</a>                                      | 15 |
| 73 | <a href="#">□ Recruitment</a>                                             | 16 |
| 74 | <a href="#">□ Screening</a>                                               | 16 |
| 75 | <a href="#">□ Informed Consent</a>                                        | 17 |
| 76 | <a href="#">□ Enrollment Visit</a>                                        | 17 |
| 77 | <a href="#">□ Randomization</a>                                           | 18 |
| 78 | <a href="#">□ Management of Study Participants During Hospitalization</a> | 18 |
| 79 | <a href="#">□ Follow-Up Visits</a>                                        | 18 |
| 80 | <a href="#">□ Missed Visits</a>                                           | 20 |
| 81 | <a href="#">□ Interim Contacts and Visits</a>                             | 20 |
| 82 | <a href="#">□ Therapy for Treatment Failure and Clinical Relapse</a>      | 20 |
| 83 | <a href="#">□ Withdrawal and Early Termination</a>                        | 20 |
| 84 | <a href="#">□ Study Termination Visit</a>                                 | 21 |
| 85 | <a href="#">□ Biohazard Containment</a>                                   | 21 |
| 86 | <a href="#">4.7 STUDY PRODUCTS</a>                                        | 21 |
| 87 | <a href="#">□ Presentation and Formulation</a>                            | 21 |
| 88 | <a href="#">□ Preparation and Administration</a>                          | 22 |
| 89 | <a href="#">□ Stability and Storage</a>                                   | 22 |
| 90 | <a href="#">□ Accountability and Disposal</a>                             | 22 |
| 91 | <a href="#">4.8 DATA COLLECTION</a>                                       | 23 |
| 92 | <a href="#">□ Case Report Forms</a>                                       | 23 |
| 93 | <a href="#">□ Source Documents</a>                                        | 23 |
| 94 | <a href="#">4.9 DATA MANAGEMENT</a>                                       | 23 |
| 95 | <a href="#">□ Data Access</a>                                             | 23 |
| 96 | <a href="#">□ Data Storage</a>                                            | 24 |
|    | <a href="#">□ External Study Monitoring</a>                               | 24 |

|     |                      |                                                                                                   |                                     |
|-----|----------------------|---------------------------------------------------------------------------------------------------|-------------------------------------|
| 97  | <a href="#">4.10</a> | <a href="#">SAFETY ASSESSMENTS AND REPORTING</a> .....                                            | 24                                  |
| 98  | <a href="#">□</a>    | <a href="#">Safety Monitoring</a> .....                                                           | 24                                  |
| 99  | <a href="#">□</a>    | <a href="#">Data Safety and Monitoring Board (DSMB)</a> .....                                     | 25                                  |
| 100 | <a href="#">□</a>    | <a href="#">Adverse Events</a> .....                                                              | 25                                  |
| 101 | <a href="#">□</a>    | <a href="#">Serious Adverse Event</a> .....                                                       | 25                                  |
| 102 | <a href="#">□</a>    | <a href="#">Adverse Event Relationship to Study Product</a> .....                                 | 26                                  |
| 103 | <a href="#">□</a>    | <a href="#">Grading Severity of Events</a> .....                                                  | 26                                  |
| 104 | <a href="#">□</a>    | <a href="#">Safety Reporting</a> .....                                                            | 26                                  |
| 105 | <a href="#">□</a>    | <a href="#">Study Discontinuation</a> .....                                                       | 27                                  |
| 106 | <a href="#">5</a>    | <a href="#">STATISTICAL DESIGN AND ANALYSIS</a> .....                                             | 27                                  |
| 107 | <a href="#">5.1</a>  | <a href="#">DATA ANALYSIS</a> .....                                                               | 27                                  |
| 108 | <a href="#">□</a>    | <a href="#">Overview and General Design</a> .....                                                 | 27                                  |
| 109 | <a href="#">□</a>    | <a href="#">Randomization and Blinding Procedures</a> .....                                       | 27                                  |
| 110 | <a href="#">□</a>    | <a href="#">Objectives and Endpoints</a> .....                                                    | 27                                  |
| 111 | <a href="#">□</a>    | <a href="#">Analytical Methodology for Interim Analyses</a> .....                                 | 30                                  |
| 112 | <a href="#">□</a>    | <a href="#">Analytical Methodology for Final Analyses</a> .....                                   | 30                                  |
| 113 | <a href="#">5.2</a>  | <a href="#">RESULT PRESENTATION</a> .....                                                         | 30                                  |
| 114 | <a href="#">5.3</a>  | <a href="#">DISSEMINATION OF RESULTS</a> .....                                                    | 31                                  |
| 115 | <a href="#">6</a>    | <a href="#">ETHICAL CONSIDERATIONS AND CONSENT</a> .....                                          | 31                                  |
| 116 | <a href="#">□</a>    | <a href="#">Principles for Clinical Research</a> .....                                            | 31                                  |
| 117 | <a href="#">□</a>    | <a href="#">Institutional Review Boards (IRBs) and Independent Ethics Committees (IECs)</a> ..... | 31                                  |
| 118 | <a href="#">□</a>    | <a href="#">Informed Consent</a> .....                                                            | 31                                  |
| 119 | <a href="#">□</a>    | <a href="#">Risks to Participants</a> .....                                                       | 32                                  |
| 120 | <a href="#">□</a>    | <a href="#">Protection against Risks</a> .....                                                    | 32                                  |
| 121 | <a href="#">□</a>    | <a href="#">Benefits to Participants</a> .....                                                    | 33                                  |
| 122 | <a href="#">□</a>    | <a href="#">Participant Confidentiality</a> .....                                                 | 33                                  |
| 123 | <a href="#">□</a>    | <a href="#">Participant Reimbursement</a> .....                                                   | 33                                  |
| 124 | <a href="#">□</a>    | <a href="#">Storage of Specimens</a> .....                                                        | 34                                  |
| 125 | <a href="#">7</a>    | <a href="#">POSSIBLE CONSTRAINTS</a> .....                                                        | 34                                  |
| 126 | <a href="#">8</a>    | <a href="#">REQUIREMENTS AND TRAINING</a> .....                                                   | 34                                  |
| 127 | <a href="#">9</a>    | <a href="#">REFERENCES</a> .....                                                                  | 34                                  |
| 128 |                      | <a href="#">APPENDICES</a> .....                                                                  | 37                                  |
| 129 |                      | <a href="#">APPENDIX I: SCHEDULE OF STUDY VISITS AND EVALUATIONS</a> .....                        | 37                                  |
| 130 |                      | <a href="#">APPENDIX II: SAMPLE COLLECTION AND LABORATORY EVALUATIONS</a> .....                   | 37                                  |
| 131 |                      | <a href="#">APPENDIX III: SAMPLE SIZE CALCULATIONS</a> .....                                      | 38                                  |
| 132 |                      | <a href="#">APPENDIX IV: STUDY REQUIREMENTS AND TRAINING</a> .....                                | 38                                  |
| 133 |                      | <a href="#">APPENDIX V: STUDY SENSITIZATION/RECRUITMENT SCRIPT</a> .....                          | 39                                  |
| 134 | <a href="#">5.1</a>  | <a href="#">Inclusion Criteria</a> .....                                                          | <b>Error! Bookmark not defined.</b> |
| 135 | <a href="#">5.2</a>  | <a href="#">Exclusion Criteria</a> .....                                                          | <b>Error! Bookmark not defined.</b> |
| 136 |                      |                                                                                                   |                                     |
| 137 |                      |                                                                                                   |                                     |

138  
139  
140  
141  
142  
143  
144  
145  
146  
147  
148  
149  
150  
151  
152  
153  
154  
155  
156  
157  
158  
159  
160  
161  
162  
163  
164  
165  
166  
167  
168  
169  
170  
171  
172  
173  
174  
175  
176  
177  
178  
179  
180  
181  
182  
183  
184  
185

|                                             |
|---------------------------------------------|
| <b>Innovative Treatments in Pneumonia 1</b> |
|---------------------------------------------|

**ABBREVIATIONS AND ACRONYMS**

|          |                                                                                                                       |
|----------|-----------------------------------------------------------------------------------------------------------------------|
| AE       | adverse event                                                                                                         |
| AIDS     | Acquired Immunodeficiency Syndrome                                                                                    |
| BDH      | Bwaila District Hospital                                                                                              |
| BMGF     | Bill & Melinda Gates Foundation                                                                                       |
| CFR      | Code of Federal Regulations                                                                                           |
| CI       | confidence interval                                                                                                   |
| COM      | College of Medicine                                                                                                   |
| COMREC   | College of Medicine Research and Ethics Committee                                                                     |
| CRF      | case report form                                                                                                      |
| CRO      | contract research organization                                                                                        |
| DSMB     | Data and Safety Monitoring Board                                                                                      |
| DT       | dispersible tablets                                                                                                   |
| GCP      | Good Clinical Practices                                                                                               |
| HIV      | Human Immunodeficiency Virus                                                                                          |
| ICF      | informed consent form                                                                                                 |
| ICH      | International Conference on Harmonisation of Technical Requirements for Registration of Pharmaceuticals for Human Use |
| ID       | identification                                                                                                        |
| IEC      | independent ethics committee                                                                                          |
| IMCI     | Integrated Management of Childhood Illness                                                                            |
| IRB      | institutional review board                                                                                            |
| ITIP     | Innovative Treatments in Pneumonia                                                                                    |
| KCH      | Kamuzu Central Hospital                                                                                               |
| kg       | kilogram                                                                                                              |
| mg       | milligram                                                                                                             |
| LAR      | legally authorized representative                                                                                     |
| MOH      | Ministry of Health                                                                                                    |
| mRDT     | malaria rapid diagnostic test                                                                                         |
| OPD      | outpatient department                                                                                                 |
| OR       | odds ratio                                                                                                            |
| PI       | principal investigator                                                                                                |
| RR       | risk ratio                                                                                                            |
| SAE      | serious adverse event                                                                                                 |
| SC       | Save the Children Federation, Inc.                                                                                    |
| SAP      | Statistical Analysis Plan                                                                                             |
| SOP      | standard operating procedure(s)                                                                                       |
| U.S. FDA | United States Food and Drug Administration                                                                            |
| UNC      | University of North Carolina                                                                                          |
| UW       | University of Washington                                                                                              |
| WHO      | World Health Organization                                                                                             |

186  
187  
188  
189  
190  
191  
192  
193  
194  
195  
196  
197  
198  
199  
200  
201  
202  
203  
204  
205  
206  
207  
208  
209  
210  
211  
212  
213  
214  
215  
216  
217

**Innovative Treatments in Pneumonia 1**

**INVESTIGATORS**

**Principal investigator (PI):**

Amy Ginsburg, MD, MPH  
Senior Advisor, Child Health  
Save the Children Federation, Inc.

  
PI signature 05/24/2015  
Date

**Local PI:**

Ajib Phiri, MD  
Senior Academic Staff, Department of Pediatrics and Child Health  
Malawi College of Medicine

Tisungane Mvalo, MB BS, FC Paed  
Consultant Pediatrician and Clinical Research Investigator  
University of North Carolina (UNC) Project, Lilongwe Trust Medical Relief Fund, Malawi

**Co-investigators:**

Susanne May, PhD  
Associate Professor, Department of Biostatistics  
University of Washington

Norman Lufesi, CO, M.Phil.  
Program Manager, Acute Respiratory Infection & Emergency Triage Assessment and Treatment  
Malawi Ministry of Health

Eric McCollum, MD  
Assistant Professor, Department of Pediatrics  
Johns Hopkins School of Medicine

218 **PARTICIPATING INSTITUTIONS**

219

|                              |                                                                                                                                                                                      |                                                                                                                        |
|------------------------------|--------------------------------------------------------------------------------------------------------------------------------------------------------------------------------------|------------------------------------------------------------------------------------------------------------------------|
| <b>Sponsor:</b>              | Save the Children Federation, Inc. (SC)<br>501 Kings Highway East, Suite 400<br>Fairfield, CT 06825                                                                                  |                                                                                                                        |
| <b>Monitor:</b>              | Triclinium Clinical Trial Project Management (Pty) Ltd.<br>135 West Street, Suite 400<br>Sandown 2196<br>South Africa                                                                |                                                                                                                        |
| <b>Medical Officers:</b>     | Amy Ginsburg, MD, MPH<br>Save the Children Federation, Inc. (SC)<br>501 Kings Highway East, Suite 400<br>Fairfield, CT 06825<br>+1-206-258-1827                                      | Janetta Strauss, MPharmMed<br>Triclinium<br>135 West Street, Suite 400<br>Sandown 2196 South Africa<br>+27-11-883-0205 |
| <b>Clinical Trial Sites:</b> | Kamuzu Central Hospital<br>Box 149<br>Lilongwe 265 (Area 33)<br>Malawi<br>+265-1-75-3555                                                                                             |                                                                                                                        |
| <b>Data Center:</b>          | Triclinium Clinical Trial Project Management (Pty) Ltd.                                                                                                                              |                                                                                                                        |
| <b>Study Operations:</b>     | University of North Carolina (UNC) Project, Lilongwe Trust Medical Relief Fund                                                                                                       |                                                                                                                        |
| <b>Statistical Support:</b>  | University of Washington (UW)                                                                                                                                                        |                                                                                                                        |
| <b>Local Collaborators:</b>  | Malawi Ministry of Health (MOH)<br>College of Medicine (COM) at the University of Malawi<br>Kamuzu Central Hospital (KCH)<br>Save the Children International – Malawi Country Office |                                                                                                                        |
| <b>Funding Agency:</b>       | Bill and Melinda Gates Foundation (BMGF)                                                                                                                                             |                                                                                                                        |

220

221

222 **EXECUTIVE SUMMARY**

223  
224  
225  
226  
227  
228  
229  
230  
231  
232  
233  
234  
235  
236  
237  
238  
239  
240  
241  
242  
243  
244  
245  
246  
247  
248  
249  
250  
251  
252  
253  
254  
255  
256  
257  
258  
259  
260  
261  
262  
263  
264

**Problem to be studied:** Pneumonia is responsible for more than one in five child deaths around the globe. Each year, approximately 1.1 million children die before their fifth birthdays due to pneumonia, more than the number of under-five deaths that result from human immunodeficiency virus (HIV), tuberculosis, and malaria combined. In addition to preventing pneumonia, there is a critical need to provide greater access to appropriate and effective treatment. Studies in Asia have evaluated the effectiveness of 3 days of oral amoxicillin for the treatment of fast-breathing pneumonia; however, further evidence is needed to evaluate whether any antibiotic treatment is required for the treatment of fast-breathing pneumonia.

The majority of cases diagnosed as fast-breathing pneumonia are not pneumonia at all. There are many possible reasons a child might demonstrate fast-breathing, and not all of them indicate disease. Fast-breathing is neither an appropriately sensitive nor specific sign for pneumonia. Therefore, treatment of fast-breathing with an antibiotic is likely to be unnecessary and inappropriate in the majority of cases, and can lead to the development of antibiotic resistance.

Given the paucity of data from Africa, African-based research is necessary to establish optimal management of childhood pneumonia in the region. With the expressed support of the Malawi Ministry of Health (MOH) and in collaboration with external experts from the University of Washington (UW), Save the Children Federation, Inc. (SC) will work closely with an investigator at the College of Medicine (COM) at the University of Malawi and the University of North Carolina (UNC) Project, Lilongwe Trust Medical Relief Fund to build evidence regarding whether treatment with amoxicillin dispersible tablets (DT) is necessary for fast-breathing childhood pneumonia in malaria-endemic settings in Africa. An expanded evidence base will contribute to future iterations of integrated community case management guidelines, which in turn will test innovative approaches to childhood pneumonia treatment.

**Type of research:** The proposed approach involves conducting a double-blinded, randomized, non-inferiority trial with the objective to assess the effectiveness of no antibiotic treatment for fast-breathing childhood pneumonia in a malaria-endemic region of Malawi.

**Objectives:** The primary objective of this study is to determine whether treatment with placebo in HIV-negative children 2 to 59 months of age with fast-breathing pneumonia is as effective as 3 days of treatment with oral amoxicillin DT.

**Methodology:** The study will enroll 2,000 children presenting to Kamuzu Central Hospital or Bwaila District Hospital in Lilongwe, Malawi. Each child will be randomized to either 3 days of amoxicillin DT or placebo DT and will be followed for 14 days with regular study visits at days 2, 3, 4 and 14 after enrollment.

**Expected findings and their dissemination:** We predict that the rates of treatment failure will be similar in both arms and that placebo will be non-inferior to 3 days of amoxicillin DT for fast-breathing pneumonia. Findings from this study will be disseminated through a peer-reviewed journal and shared with the scientific community.

**PROTOCOL OUTLINE**

| <b>Title:</b>                       | <b>Innovative Treatments in Pneumonia (ITIP) 1:</b> Double-blind randomized controlled clinical trial of 3 days of amoxicillin DT versus placebo for fast-breathing childhood pneumonia among children 2-59 months of age in Lilongwe, Malawi                                                                                                                                                                                                                                                                                                                                                                   |              |       |       |       |        |       |        |         |       |   |   |   |   |   |        |       |   |   |   |   |   |
|-------------------------------------|-----------------------------------------------------------------------------------------------------------------------------------------------------------------------------------------------------------------------------------------------------------------------------------------------------------------------------------------------------------------------------------------------------------------------------------------------------------------------------------------------------------------------------------------------------------------------------------------------------------------|--------------|-------|-------|-------|--------|-------|--------|---------|-------|---|---|---|---|---|--------|-------|---|---|---|---|---|
| <b>Sponsor:</b>                     | Save the Children Federation, Inc. (SC)                                                                                                                                                                                                                                                                                                                                                                                                                                                                                                                                                                         |              |       |       |       |        |       |        |         |       |   |   |   |   |   |        |       |   |   |   |   |   |
| <b>Collaborating Organizations:</b> | Save the Children International – Malawi Country Office<br>University of Washington (UW)<br>Malawi Ministry of Health (MOH)<br>College of Medicine (COM) at the University of Malawi<br>University of North Carolina (UNC) Project, Lilongwe Trust Medical Relief Fund<br>Kamuzu Central Hospital (KCH)                                                                                                                                                                                                                                                                                                         |              |       |       |       |        |       |        |         |       |   |   |   |   |   |        |       |   |   |   |   |   |
| <b>Funding Source:</b>              | Bill and Melinda Gates Foundation (BMGF)                                                                                                                                                                                                                                                                                                                                                                                                                                                                                                                                                                        |              |       |       |       |        |       |        |         |       |   |   |   |   |   |        |       |   |   |   |   |   |
| <b>Study Products:</b>              | Placebo DT (intervention) vs 3 days (control) of 250 mg amoxicillin DT in two divided doses based on age bands (500 mg/day for children 2 months up to 12 months, 1000 mg/day for children 12 months up to 3 years, and 1,500 mg/day for children 3 years up to 5 years of age)                                                                                                                                                                                                                                                                                                                                 |              |       |       |       |        |       |        |         |       |   |   |   |   |   |        |       |   |   |   |   |   |
| <b>Rationale:</b>                   | Build evidence regarding whether treatment with amoxicillin DT is necessary for fast-breathing childhood pneumonia in a malaria-endemic setting in Africa                                                                                                                                                                                                                                                                                                                                                                                                                                                       |              |       |       |       |        |       |        |         |       |   |   |   |   |   |        |       |   |   |   |   |   |
| <b>Population:</b>                  | 2,000 HIV-1 seronegative children ages 2-59 months of age with fast-breathing pneumonia                                                                                                                                                                                                                                                                                                                                                                                                                                                                                                                         |              |       |       |       |        |       |        |         |       |   |   |   |   |   |        |       |   |   |   |   |   |
| <b>Schema:</b>                      | Eligible volunteers will be randomized in a double-blinded manner in a 1:1 ratio as follows:<br><br>ITIP1: fast-breathing                                                                                                                                                                                                                                                                                                                                                                                                                                                                                       |              |       |       |       |        |       |        |         |       |   |   |   |   |   |        |       |   |   |   |   |   |
|                                     | <table border="1"> <thead> <tr> <th>Study groups</th> <th>N</th> <th>Day 1</th> <th>Day 2</th> <th>Day 3</th> <th>Day 4</th> <th>Day 14</th> </tr> </thead> <tbody> <tr> <td>Placebo</td> <td>1,000</td> <td>X</td> <td>X</td> <td>X</td> <td>X</td> <td>X</td> </tr> <tr> <td>3 days</td> <td>1,000</td> <td>X</td> <td>X</td> <td>X</td> <td>X</td> <td>X</td> </tr> </tbody> </table>                                                                                                                                                                                                                        | Study groups | N     | Day 1 | Day 2 | Day 3  | Day 4 | Day 14 | Placebo | 1,000 | X | X | X | X | X | 3 days | 1,000 | X | X | X | X | X |
| Study groups                        | N                                                                                                                                                                                                                                                                                                                                                                                                                                                                                                                                                                                                               | Day 1        | Day 2 | Day 3 | Day 4 | Day 14 |       |        |         |       |   |   |   |   |   |        |       |   |   |   |   |   |
| Placebo                             | 1,000                                                                                                                                                                                                                                                                                                                                                                                                                                                                                                                                                                                                           | X            | X     | X     | X     | X      |       |        |         |       |   |   |   |   |   |        |       |   |   |   |   |   |
| 3 days                              | 1,000                                                                                                                                                                                                                                                                                                                                                                                                                                                                                                                                                                                                           | X            | X     | X     | X     | X      |       |        |         |       |   |   |   |   |   |        |       |   |   |   |   |   |
| <b>Objectives:</b>                  | <ol style="list-style-type: none"> <li>1. Primary: treatment effectiveness</li> <li>2. Secondary: clinical relapse, treatment failure or clinical relapse, cofactors of malaria, wheeze, and age</li> </ol>                                                                                                                                                                                                                                                                                                                                                                                                     |              |       |       |       |        |       |        |         |       |   |   |   |   |   |        |       |   |   |   |   |   |
| <b>Endpoints:</b>                   | <ol style="list-style-type: none"> <li>1. Primary: <ul style="list-style-type: none"> <li>o Proportion of children failing treatment</li> </ul> </li> <li>2. Secondary: <ul style="list-style-type: none"> <li>o Proportion of children with clinical relapse</li> <li>o Proportion of children with clinical relapse or treatment failure</li> <li>o Proportion of children failing treatment among those testing positive for malaria (overall)</li> <li>o Proportion of children failing treatment among those with wheeze</li> <li>o Proportion of children failing treatment by age</li> </ul> </li> </ol> |              |       |       |       |        |       |        |         |       |   |   |   |   |   |        |       |   |   |   |   |   |
| <b>Timeline:</b>                    | Projected duration of enrollment is about 30 months.<br>All children will be followed for 14 days after randomization.                                                                                                                                                                                                                                                                                                                                                                                                                                                                                          |              |       |       |       |        |       |        |         |       |   |   |   |   |   |        |       |   |   |   |   |   |



**BACKGROUND AND INTRODUCTION**

In resource-limited settings, the World Health Organization’s (WHO) integrated management of childhood illness (IMCI) guidelines diagnose pneumonia by identifying fast-breathing.<sup>[1]</sup> However, the majority of cases diagnosed as fast-breathing pneumonia are likely not pneumonia at all. There are many possible reasons a child might demonstrate fast-breathing, many of which do not indicate disease.<sup>[2][3][4]</sup> Existing case-management guidelines maximize sensitivity over specificity, resulting in widespread over-prescription of antibiotics. Given the growing problem of antibiotic resistance worldwide, such guidelines must be revised.<sup>[5][6][7]</sup>

The current WHO guidelines released in 2014 recognize two classifications of childhood pneumonia. Children with fast-breathing and/or chest-indrawing are considered to have “pneumonia” with outpatient treatment recommended; children with additional symptoms are classified with “severe pneumonia” and the guidelines specify inpatient treatment.<sup>[8]</sup> Amoxicillin is recommended as the first-line treatment for both subcategories of the “pneumonia” classification.<sup>[9][10]</sup> In settings of low HIV prevalence, WHO recommendations are for 3 days of twice daily dosing for the children in the fast-breathing subcategory and for 5 days of twice daily dosing for children in the chest-indrawing subcategory.

The WHO recommendations were developed based on a review of the then-existing evidence, using the GRADE methodology.<sup>[11]</sup> In 2012, WHO published a GRADE evidence table regarding the need to treat fast-breathing pneumonia (called “non-severe pneumonia” at the time) with antibiotics, listing two relevant studies. The expert panel classified this evidence as “low quality” for the use of antibiotics in children with non-severe pneumonia without wheeze. For future updates to the guidelines, further evidence must be generated using carefully designed, scientifically sound studies repeated in multiple geographic regions.

There are methodological issues with some of the research suggesting antibiotics are necessary for fast-breathing. In 2004, WHO panels reviewed data from the NARIMA study, which found high rates of radiographically-confirmed pneumonia among children with fast-breathing in Durban, South Africa and Ho Chi Minh City, Vietnam.<sup>[12][13]</sup> This study’s results were neither peer-reviewed nor published (Dr. Don Thea, personal communication) The sample size of this observational study was relatively small (under 200 children) and did not exclude children with HIV-infection/exposure or severe acute malnutrition, potentially affecting the higher rates of positive radiographs found at the Durban site in particular. Standardization of the study’s radiological review was not described in its unpublished report<sup>[14]</sup> Other studies have characterized the limitations of chest radiography in children, finding that generating consensus readings is difficult and inconsistent.<sup>[15][16]</sup>

More recent evidence suggests that antibiotics may not be needed to treat fast-breathing pneumonia as defined by WHO IMCI criteria. However, due to methodological limitations, many studies to date have not provided definitive answers with which to change international guidelines. At a 2014 expert panel meeting at the WHO, multiple experts in the field explicitly called for more research comparing antibiotics to no antibiotics in the management of WHO-defined fast-breathing pneumonia.<sup>[17]</sup> Indeed, the movement away from antibiotics for community-acquired pneumonia (CAP) is already underway in high-resource settings. In the United States, clinical practice guidelines established by the Pediatric Infectious Diseases Society and the Infectious Diseases Society of America note that for outpatients, “antimicrobial therapy is not routinely required for preschool-aged children with CAP, because viral pathogens are responsible for the great majority of clinical disease. (strong recommendation; high-quality evidence).”<sup>[18]</sup>

The WHO IMCI diagnosis criteria for pneumonia are widely acknowledged to have low specificity.<sup>[19]</sup> This lack of specificity results in misclassification in the majority of cases. Fast-breathing may be caused by conditions other than pneumonia, and affected by other factors, such as fever. In multiple studies, children with fast-breathing and cough were usually found to have only mild upper respiratory tract infections and not clinical pneumonia when assessed by physicians or by examining chest radiographs.<sup>[2][3][4]</sup> An observational study in Pakistan found that out of 1848 children diagnosed with fast-breathing pneumonia, only 14% had radiographical evidence of pneumonia while the rest had either normal chest radiographs (82%) or evidence of bronchiolitis (4%).<sup>[2]</sup> That study did not identify the laboratory-based etiology of the radiographically-confirmed cases of pneumonia, but the researchers

325 noted that there were only 26 cases of lobar consolidation (1.4%), a presentation that has been linked to bacterial  
326 pneumonia.<sup>[20]</sup> The rest of the positive chest radiographs had interstitial findings, which are more likely associated  
327 with non-bacterial etiologies. A Tanzanian study found that respiratory rate itself is highly dependent on external  
328 factors unrelated to disease. Observing 167 children in an outpatient setting, researchers found that the median  
329 respiratory rate dropped significantly after the patient spent 60 minutes in a quiet setting, leading to up to 85%  
330 misclassification of fast-breathing pneumonia in enrolled infants.<sup>[21]</sup>

331  
332 Existing research suggests that the majority of cases of fast-breathing pneumonia will resolve without the use of  
333 antibiotics. In a Tanzanian study evaluating the causes of fever among outpatient children, researchers showed that  
334 in the absence of critical illness (and after ruling out malaria), most febrile outpatient children can be effectively  
335 treated without antibiotics.<sup>[22]</sup> Studies in South and Southeast Asia found high rates (62% and 85%) of response to  
336 bronchodilators among children diagnosed with both fast-breathing pneumonia and wheeze, with low rates (15%  
337 and 4%, respectively) of clinical deterioration on follow-up, despite not receiving antibiotics.<sup>[23][24]</sup> Wheeze has  
338 repeatedly been found to be common in viral infections, particularly in those due to respiratory syncytial virus.<sup>[25]</sup> A  
339 2011 Cochrane Review analysis found no difference in clinical outcomes in cases of bronchiolitis treated with either  
340 antibiotics or placebo.<sup>[26]</sup>

341  
342 Testing the hypothesis that antibiotics are not needed to manage fast-breathing pneumonia, a double-blind,  
343 randomized, equivalence trial in four tertiary hospitals in Pakistan among 900 children aged 2–59 months with  
344 WHO-defined fast-breathing pneumonia compared treatment failure after 3 days of oral amoxicillin (45 milligrams  
345 [mg]/kilogram [kg]/day) or placebo.<sup>[27]</sup> The study found that 31 (7.2%) of the 431 children in the amoxicillin arm  
346 and 37 (8.3%) of the 442 in the placebo group had therapy failure. This difference was not statistically significant  
347 (odds ratio [OR] 0.85; 95% CI 0.50–1.43; P 5 .60). The multivariate analysis identified history of difficult breathing  
348 (OR 2.86; 95% CI 1.29–7.23; P 5 .027) and temperature of 37.5°C at presentation (OR 1.99; 95% CI 1.37–2.90; P 5  
349 .0001) as risk factors for treatment failure by day 5. This research suggests that treatment of fast-breathing with an  
350 antibiotic is likely to be unnecessary and inappropriate in the majority of cases.

351  
352 The consequences of such inappropriate treatment are profound. It is well-established that the overuse of antibiotics  
353 leads to the development of antibiotic resistance.<sup>[28]</sup> Management of fast-breathing cases without antibiotics would  
354 be much simpler to do by community health workers and would avoid issues of emerging antibiotic resistance as  
355 well as reduce the rates of adverse events (AEs) associated with unnecessary antibiotics.

356  
357 Currently pneumococcal resistance to amoxicillin is low in African settings; however, the prevalence of bacterial  
358 resistance to other antibiotics used to treat pneumonia is on the rise in the region.<sup>[29]</sup> Indeed, many common  
359 pathogens causing childhood respiratory, diarrheal, and sepsis infections are resistant to virtually all first-generation  
360 antibiotics as a result of decades of extensive use.<sup>[30]</sup> In hospitalized Malawian populations, 89–96% of  
361 *Streptococcus pneumoniae*—the primary pathogen responsible for bacterial pneumonia—is now resistant to  
362 cotrimoxazole.<sup>[31][32]</sup> These Malawian surveillance studies have identified multiple other antibiotics with appreciable  
363 resistance prevalence. Especially as the use of oral amoxicillin increases through the support of WHO and the UN  
364 Commission on Life-Saving Commodities for Women and Children, good antibiotic stewardship is increasingly  
365 important for amoxicillin to remain a long-term solution for treating childhood pneumonia.<sup>[33][34]</sup>

366  
367 In addition to preventing antibiotic resistance, reducing the unnecessary use of antibiotics will decrease the burden  
368 on the health systems in resource-limited settings. Rational use of antibiotics would help drive down the costs  
369 associated with treatment of childhood pneumonia and allow resources to be allocated to those most likely to benefit  
370 from the use of antibiotics. Even though individual doses of amoxicillin are relatively cheap, the overall cost of  
371 antibiotic treatment for all children with WHO-defined pneumonia is substantial. In Pakistan, the average cost to  
372 treat a single case of childhood pneumonia in an outpatient setting was estimated to be \$13.44 in 2006, representing  
373 82% of the country’s annual health expenditure per person at the time.<sup>[35]</sup> The absolute and proportional costs in  
374 Southeast Asia are comparable to those in sub-Saharan Africa.<sup>[36]</sup>

375  
376 Nor are the effects of antibiotic overuse limited solely to public health consequences. Inappropriate use of antibiotics  
377 has risks at the individual level as well. Amoxicillin is known for being relatively well-tolerated among children, but  
378 it still has documented side effects. Common AEs include diarrhea, nausea, rash, and vomiting. The list of  
379 infrequent side effects for oral amoxicillin includes more severe conditions such as allergic reactions, while rare side  
380 effects can be as serious as abnormal liver function tests, interstitial nephritis, seizures, and Stevens-Johnson

381 syndrome.<sup>[37]</sup> Exposing children who would not benefit from antibiotics to such AEs should be avoided, when  
382 possible. Additionally, there is evidence that early in life, repeated exposure to antibiotics disturbs the gut  
383 microbiota in such a way that growth and nutrition can be impaired.<sup>[38]</sup> This growing body of literature suggests that  
384 over the long-term, antibiotic use can result in altered immune processing that may increase the risk of subsequent  
385 infections.<sup>[39][40]</sup> By prescribing antibiotics to children that do not need them, those children have an unnecessarily  
386 increased risk of AEs associated with antibiotics and can have long-term deleterious health effects.

387  
388 Clinical research has long included trials to test established medical practices against a new practice, frequently  
389 resulting in medical reversals when an existing practice is found to be no better than a lesser practice.<sup>[41]</sup> Indeed,  
390 clinical trials in children with acute otitis media (AOM) have compared antibiotics to placebo to determine if the  
391 standard practice of prescribing antibiotics is warranted. A 2015 meta-analysis of 13 such RCTs from high-income  
392 countries concluded that “most cases of AOM spontaneously remit without complications. The benefits of  
393 antibiotics must be weighed against the possible harms: for every 14 children treated with antibiotics one child  
394 experienced an adverse event (such as vomiting, diarrhea or rash) that would not have occurred had antibiotics been  
395 withheld.”<sup>[42]</sup> Amoxicillin is often prescribed for AOM and was used in many of the RCTs reviewed. The acceptable  
396 risk-benefit ratio of prescribing amoxicillin is certain to be different for AOM than for fast-breathing pneumonia.  
397 Nonetheless, a review of antibiotics for preventing suppurative complications in undifferentiated acute respiratory  
398 infections (ARI) concluded that “the quality of evidence currently available does not provide strong support for  
399 antibiotic use as a means of reducing risk of otitis media or pneumonia in children up to five years of age with  
400 undifferentiated ARIs.”<sup>[43]</sup>

401  
402 More research is needed and, in particular, more research and evidence is needed from malaria-endemic settings in  
403 Africa. In fact, a 2014 Cochrane Review was conducted specifically to investigate the existing evidence comparing  
404 antibiotic to no antibiotic treatment for fast-breathing pneumonia. The study found a lack of research in this area and  
405 recommended that “trials should be carried out to assess the differences between treatment with antibiotics and no  
406 antibiotics for non-severe pneumonia with wheeze in children.”<sup>[25]</sup> A clinical trial, referred to as RETAPP, is  
407 currently underway in Karachi, Pakistan comparing 3 days of amoxicillin to placebo for children with fast-breathing  
408 pneumonia. Findings from RETAPP and the proposed ITIPI trial would provide evidence regarding appropriate  
409 treatment for fast-breathing pneumonia from South Asia and sub-Saharan Africa. The results of trials from two high  
410 pneumonia prevalence settings would provide evidence for updating WHO IMCI guidelines for management of fast-  
411 breathing pneumonia globally.

## 412 **RATIONALE**

413  
414 There is a critical need for African-specific data, as countries in Africa, including Malawi, endeavor to put into place  
415 evidence-based policies and treatment guidelines informed by the local context. Many cases of diagnosed “fast-  
416 breathing pneumonia” are not pneumonia at all and may be inappropriately treated with antibiotics, leading to the  
417 emergence of antibiotic resistance. This blinded study proposes to compare treatment effectiveness of 3 days of  
418 amoxicillin versus 3 days of placebo for fast-breathing childhood pneumonia. **Extreme care will be taken in this  
419 study to protect the safety of all participants.** The clinical trial described in this protocol is intend to provide  
420 evidence that could improve access to care by improving case management of pneumonia at the household level,  
421 which will lead to improved drug adherence and significantly reduce childhood pneumonia deaths.

## 422 **STUDY HYPOTHESIS, OBJECTIVES AND ENDPOINTS**

### 423 424 • **Study Hypothesis**

425  
426 Placebo is non-inferior in terms of treatment effectiveness compared to 3 days of amoxicillin DT treatment for fast-  
427 breathing pneumonia.

### 428 429 • **Study Objectives**

430  
431 The broad objective of this study is to provide scientific evidence assessing the necessity of treatment with  
432 amoxicillin DT for fast-breathing childhood pneumonia in a malaria-endemic setting in Malawi, Africa.

- 433 ○ Primary Objective

437                   ▪ To determine whether treatment with placebo in HIV-negative children 2 to 59 months of age with  
438 fast-breathing pneumonia is as effective as 3 days of treatment with oral amoxicillin DT.

439

440           ○ Secondary Objectives

441                   ▪ To determine whether the intervention arm has equivalent rates of treatment relapse as the control  
442 arm among those without treatment failure before or on day 4.

443                   ▪ To determine whether the intervention arm has equivalent rates of combined treatment failure and  
444 relapse before or on day 14 as the control arm.

445                   ▪ To investigate whether there may be a differential treatment response in children who test positive  
446 for malaria at baseline. This information will be useful to plan further childhood pneumonia and  
447 malaria integrated interventions in similar settings.

448                   ▪ To determine whether there is a differential treatment response in enrolled children with wheeze  
449 during screening (identified prior to any bronchodilator administration).

450                   ▪ To determine whether there is a differential treatment response by age.

451

452   • **Study Endpoints**

453

454           ○ Primary Endpoints

455           Proportion of children failing treatment, defined as the development of any of the following during the  
456 specified time periods:

457           Any time before or on day 4:

458                   ▪ WHO danger signs

459                   ▪ Oxygen saturation < 90% by pulse oximetry

460                   ▪ Chest-indrawing

461                   ▪ Vomiting within 30 minutes of 2 or more scheduled (i.e., not repeat) dose administrations of  
462 study product

463                   ▪ Change in antibiotics prescribed by a study clinician (e.g., switch to a second-line antibiotic or  
464 prescription for onset of a co-infection)

465                   ▪ Hospitalization due to pneumonia (if not initially admitted)

466                   ▪ Prolonged hospitalization or readmission due to pneumonia (if initially admitted)

467           At day 4 outcome assessment:

468                   ▪ Documented axillary temperature  $\geq 38^{\circ}\text{C}$  in the absence of diagnosed co-infection with fever  
469 symptoms (e.g., malaria)

470

471           ○ Secondary Endpoints

472                   ▪ Proportion of children with clinical relapse between treatment failure assessment and day 14  
473 follow-up visit among all children without treatment failure before or on day 4.

474                   ▪ Proportion of children with either treatment failure or clinical relapse before or on day 14 (among  
475 all randomized children).

476                   ▪ Proportion of children with treatment failure among those testing positive for malaria by rapid  
477 diagnostic testing (mRDT) at baseline (overall).

478                   ▪ Proportion of enrolled children failing treatment among those with wheeze during screening  
479 (identified prior to administration of bronchodilators).

480                   ▪ Proportion of children failing treatment by age at baseline.

481

482 **METHODOLOGY**

483

484 **STUDY DESIGN**

485

486 This project involves a double-blinded, randomized, non-inferiority trial in children 2-59 months of age from a  
487 malaria-endemic setting in Malawi comparing the effectiveness of placebo to 3-day amoxicillin DT treatment for  
488 fast-breathing, community-acquired pneumonia (ITIP1). We plan to evaluate placebo versus 3 days of oral  
489 amoxicillin DT treatment among 2,000 children presenting with fast-breathing pneumonia in a malaria-endemic  
490 region of Malawi. Our study will be evaluating twice-daily administration of amoxicillin DT based on age bands  
491 (500 mg/day for children 2 months up to 12 months, 1000 mg/day for children 12 months up to 3 years, and 1,500  
492 mg/day for children 3 years up to 5 years of age), the current WHO-recommended therapy.<sup>[13]</sup> Enrolled children will

493 be followed for 14 days with frequent clinical contact in the first four days and then an exit visit on Day 14. All  
494 children will be closely monitored for treatment failure signs and symptoms; any child failing treatment (in either  
495 arm) will be hospitalized and treated with second line antibiotics.

## 496 497 **STUDY SITE**

498  
499 The Save the Children (SC) PI; the local co-PI, from the College of Medicine (COM) at the University of Malawi  
500 and the University of North Carolina (UNC) Project, Lilongwe Trust Medical Relief Fund; and the team of co-  
501 investigators will conduct the research at Kamuzu Central Hospital (KCH) in Lilongwe. A 750-bed government  
502 facility, KCH is the primary referral hospital for the central region of Malawi, serving a population of approximately  
503 5 million. Up to 30 or 40 children 5 years of age or younger with fast-breathing pneumonia are seen each day in the  
504 outpatient department (OPD) at KCH during the peak pneumonia season. The KCH pediatric department alone  
505 admits around 22,000 children per year.

506  
507 One of the major medical training institutions in Malawi, KCH has four full-time on-call pediatricians, two part-time  
508 pediatricians, three medical officers, three to six medical interns, 12 full-time clinical officers, and 45 nurses on  
509 staff. In the OPD, two to three clinicians with the support of two to three health surveillance assistants manage the  
510 triage area. In addition to the triage area, there are also emergency/resuscitation, priority, and low-risk areas in the  
511 OPD. The hospital has a high-functioning laboratory unit and a radiology unit that is capable of conducting chest  
512 radiographs (including a mobile unit, which is housed in the pediatric ward), ultrasounds, and computed tomography  
513 scans.

## 514 515 **STUDY POPULATION**

### 516 517 • **Study Population Overview**

518  
519 Although KCH draws from a large catchment area in the central region of Malawi, children eligible for this study  
520 are to be from the Lilongwe District. Malawi is ranked 174<sup>th</sup> in the United Nations Development Programme's  
521 human development index, and almost 89% of the working population earns less than \$2USD a day.<sup>[44]</sup> Lilongwe  
522 includes large peri-urban settlements with crowded living conditions and without adequate sanitation infrastructure.  
523 Overall, the nation's adult literacy rate is 61%. Life expectancy at birth is 55.31 years and the under-five mortality  
524 rate is 71 deaths per 1000 children.

525  
526 Malaria is endemic in Malawi with the highest prevalence of malaria parasitaemia in children between 6 and 36  
527 months of age (60.1%).<sup>[45]</sup> The incidence of malaria in the area is highest during the rainy season, between  
528 December and April each year. Malawi's adult HIV prevalence was estimated to be 10.3% in 2013. There were  
529 170,000 estimated HIV-positive children 14 and younger. HIV is more prevalent in urban communities than rural  
530 areas.<sup>[46]</sup>

531  
532 We expect study participants to be representative of the ethnic demographics in the area. We anticipate enrolling  
533 equal numbers of female and male children for a total participant population of 2,000 volunteers for this trial.

### 534 535 • **Participant Eligibility**

536  
537 Study participants will be HIV-1 seronegative children 2-59 months of age who present to KCH or Bwaila District  
538 Hospital (BDH) with fast-breathing. Volunteer families will be recruited and screened, those whose children are  
539 determined to be eligible, based on the inclusion/exclusion criteria, will be enrolled in the study and followed for 14  
540 days. Recruitment, screening and enrollment can occur at KCH or BDH. Hospital observation or admission, and  
541 follow-up will occur at KCH. Final eligibility determination will depend on the results of the medical history,  
542 clinical examination, appropriate understanding of the study and completion of the consent process.

543  
544 Case definition of fast-breathing pneumonia:

- 545 ○ Cough <14 days or difficulty breathing
- 546 ○ Respiratory rate  $\geq 50$  breaths/minute (for children 2 to <12 months of age) or  $\geq 40$  breaths/minute (for  
547 children  $\geq 12$  months of age)

548

- 549 • **Inclusion Criteria**  
550  
551 ○ Male or female, 2 to 59 months of age.  
552 ○ History of cough <14 days or difficult breathing with fast-breathing (for children 2 to <12 months of age,  
553  $\geq 50$  breaths/minute and for children  $\geq 12$  months of age,  $\geq 40$  breaths/minute).  
554 ○ Ability and willingness of children's caregiver to provide informed consent and to be available for follow-  
555 up for the planned duration of the study, including accepting a home visit if he/she fails to return to KCH  
556 with the child for a scheduled study follow-up visit.  
557
- 558 • **Exclusion Criteria**  
559  
560 ○ If fast-breathing observed at screening resolves after bronchodilator challenge, among those with wheeze at  
561 screening.  
562 ○ Chest-indrawing.  
563 ○ Severe respiratory distress (e.g., grunting, nasal flaring, head nodding, or severe chest-indrawing).  
564 ○ Presence of WHO IMCI danger signs including: lethargy or unconsciousness, convulsions, vomiting  
565 everything, or inability to drink or breastfeed.  
566 ○ Hypoxia ( $\text{SaO}_2 < 90\%$  on room air, as assessed by a pulse oximeter).  
567 ○ Stridor when calm.  
568 ○ HIV-1 seropositivity or HIV-1 exposure, assessed as follows:  
569 • An HIV-positive result upon rapid antibody test will exclude any child from this study.  
570 • If a child is less than 12 months of age with a positive rapid test result, the child will be referred to  
571 receive additional confirmatory HIV testing (e.g., dried blood spot filter paper test) and follow-up  
572 from KCH staff, as per standard of care. Even if the confirmatory HIV testing subsequently shows  
573 that child is HIV-negative, he or she will remain excluded from the study.  
574 • If a child is less than 24 months of age and has an HIV-negative result upon rapid antibody test,  
575 the child's biological mother's HIV status will need to be assessed. If the mother is HIV-positive,  
576 the child will be excluded. If the mother has a documented HIV-negative test result from within  
577 the past 3 months, the child will be included. If the mother does not have documentation of an  
578 HIV-negative test result, she will be tested via rapid antibody testing to determine the child's  
579 eligibility for this study.  
580 • If a child is over 24 months of age, an HIV-negative rapid antibody test is required for inclusion in  
581 the study.  
582 • Note: If a child has documentation of an HIV-negative test result from within the past 6 weeks,  
583 that test result will be used for the child's eligibility assessment according to the algorithm  
584 described above.  
585 ○ Severe acute malnutrition (weight for height/length  $< -3$  SD, mid-upper arm circumference  $< 115$  mm, or  
586 edema).  
587 ○ Possible tuberculosis (coughing for more than 14 days).  
588 ○ Severe anemia, classified by WHO pocketbook guidelines (i.e., severe palmar pallor or hemoglobin  $< 8.0$   
589 g/dL).  
590 ○ Severe malaria, classified by WHO pocketbook guidelines (i.e., positive mRDT with any danger sign, stiff  
591 neck, abnormal bleeding, clinical jaundice, or hemoglobinuria).  
592 ○ Known allergy to penicillin or amoxicillin.  
593 ○ Receipt of an antibiotic treatment in the 48 hours prior to the study based on caregiver's self-report and/or  
594 documentation in child's medical record.  
595 ○ Hospitalized within 14 days prior to the study.  
596 ○ Living outside Lilongwe urban area, the study catchment area.  
597 ○ Any medical or psychosocial condition or circumstance that, in the opinion of the investigators, would  
598 interfere with the conduct of the study or for which study participation might jeopardize the child's health.  
599 ○ Any non-pneumonia acute medical illness which requires antibiotic treatment per local standard of care.  
600 ○ Participation in a clinical study of another investigational product within 12 weeks prior to randomization  
601 or planning to begin participation during this study.  
602 ○ Prior participation in an Innovative Treatments in Pneumonia study during a previous pneumonia  
603 diagnosis.

604  
605  
606  
607  
608  
609  
610  
611  
612  
613  
614  
615  
616  
617  
618  
619  
620  
621  
622  
623  
624  
625  
626  
627  
628  
629  
630  
631  
632  
633  
634  
635  
636  
637  
638  
639  
640  
641  
642  
643  
644  
645  
646  
647  
648  
649  
650  
651  
652  
653  
654  
655  
656  
657  
658

## STUDY PERIOD

Each child will be followed for 14 days after enrollment. Projected duration of enrollment is anticipated to be about 18 months. The high volume of children presenting to the OPD each day with pneumonia is expected to exceed the capacity of study staff to adequately assess each child for this study, so a maximum of 15 children will be enrolled each day. To avoid potential selection bias, each day children will be screened for enrollment in a sequential manner, as much as possible. Children that are not assessed for this study will receive the standard of care at KCH or BDH, which includes 5 days of oral amoxicillin, a case-by-case assessment for hospitalization, and treatment of any co-infections.

The funding for this study is for three years. This period includes the time required to prepare the necessary documents for the study, train all study personnel, initiate the study site, conduct the study and all data collection procedures, clean and analyze the data, and prepare the results for publication and presentation.

## SAMPLE SIZE

Refer to Section 5, Statistical Design and Analysis, for more details. With a sample size of 2,000 children (1,000 per treatment group) we aim to rule out a relative increase in failure rate of 50%. The power of the study to show non-inferiority of the placebo group at the final analysis when both treatment groups have exactly the same failure rate depends on the failure rate in the standard treatment group. The estimated power is adjusted for a 5% loss to follow-up rate in each of the arms. For example, with 1,900 children (950 per treatment arm) this study has 85% power to show non-inferiority of the placebo group if the failure rate in both groups is 7% and the non-inferiority margin is a 50% relative increase (absolute non-inferiority margin of 3.5%). For this failure rate in the standard treatment group (of 7%), at the final analysis the 95% confidence interval would exclude 10.5%, even if the failure rate is as large as 8.33% in the placebo treatment group. With 1,900 children the power of this study to show non-inferiority ranges from 66% if the failure rates in both groups is 4% to 94% if the failure rates in both groups is 10% (assuming a relative non-inferiority margin of 50% (or equivalently a factor of 1.5). Prior to the interim analysis we will be considering the potential to increase the sample size of the study based on a blinded examination of the overall failure rate, to ensure maintaining a pre-specified level of power. Details will be provided in the Statistical Analysis Plan (SAP). We chose a relative non-inferiority margin for the fast-breathing study (rather than an absolute failure rate) because there is higher uncertainty regarding the failure rate for fast-breathing pneumonia and because a more conservative approach to the non-inferiority margin for smaller failure rates was assumed to be acceptable to policymakers and stakeholders for a study of pneumonia that includes a placebo treatment group.

## STUDY PROCEDURES

Figure 1. Study Flow Diagram

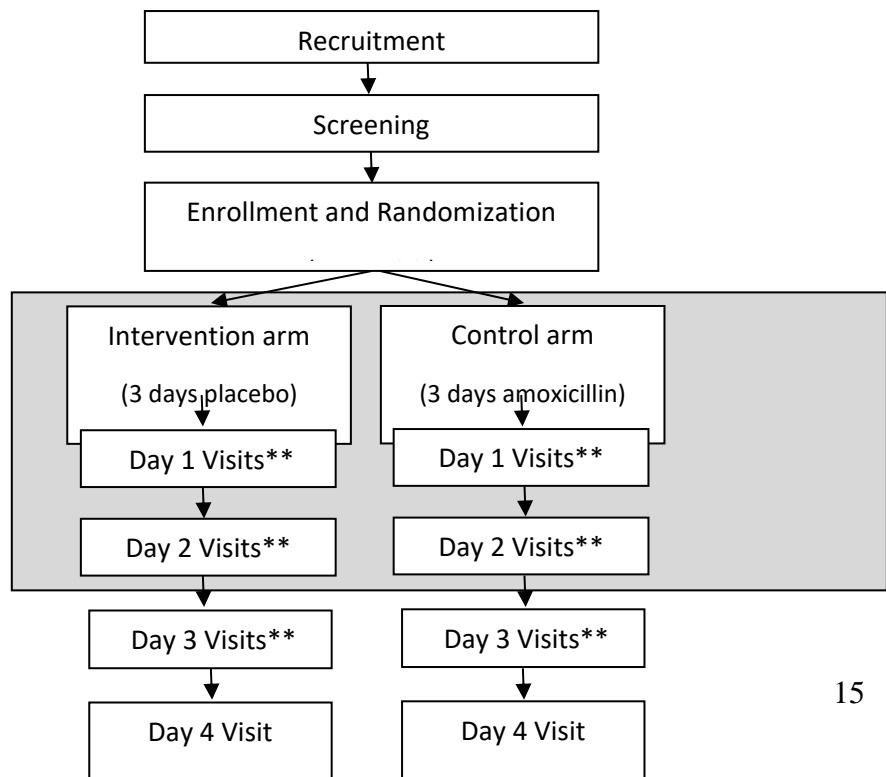

659  
660  
661  
662  
663  
664  
665  
666  
667  
668  
669  
670  
671  
672  
673  
674  
675  
676  
677  
678  
679  
680  
681  
682  
683  
684  
685  
686  
687  
688  
689  
690  
691  
692  
693  
694  
695  
696  
697  
698  
699  
700  
701  
702  
703  
704  
705  
706  
707  
708  
709  
710  
711  
712  
713  
714

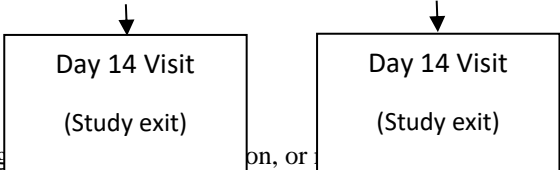

\*For example, children <6 months of age, on, or ever.  
\*\*Morning study visit in-person, afternoon/evening phone call (in-person if child is admitted).

Refer to Appendix I for Study Procedures and Visits Table. Refer to Appendix II for Laboratory Specimens Collection, Timing and Distribution Table.

Note that at study initiation, a pilot study will be conducted with up to 100 participants. For these participants, all study procedures as outlined below will be followed EXCEPT for the study product allocation. Pilot participants will undergo mock randomization as all participants in the pilot phase will receive 3 days of active drug. The purpose of this pilot study is to ensure study feasibility, safety and conduct prior to allocating study product based on randomization. Participants in the study pilot will not be informed of the mock randomization process or that they all received active drug. Concealing this will allow study staff to evaluate procedures and participant compliance in a situation that exactly mirrors that of the clinical trial. All data collected on participants enrolled in the pilot study will be entered into a separate database and will not be analyzed with the data from the main trial. The target enrollment of 2,000 participants for the main trial does not include those participants enrolled in the study pilot.

• **Recruitment**

Recruitment for this study will be performed by KCH or BDH staff during routine intake and screening procedures for the OPDs. Children between 2 to 59 months of age presenting to the OPD with cough or difficult breathing will be assessed by hospital staff for potential referral to the study. For any children with a cough fewer than 14 days and fast-breathing, the clinician will read to the caregiver an ITIP recruitment script (refer to Appendix V) with a brief introduction to the study. If the caregiver is interested in learning more about the study and in potentially having the child assessed for eligibility, he/she will be referred to study staff.

All KCH staff involved in recruitment procedures will be trained in relevant study-specific procedures and certified in GCP. Each recruitment and referral interaction will be documented for study records. Due to busy clinic workflow, the study may provide additional staffing assistance in the OPDs, in which case initial recruitment efforts may also be performed by study staff responsible for standard KCH or BDH duties.

• **Screening**

Screening procedures are conducted by study staff to determine eligibility for enrollment in the study. All inclusion/exclusion criteria must be assessed on presentation. The following procedures are performed for screening:

- Provide information on the study
- Obtain written informed consent for screening
- Assign participant identification (ID) number
- Collect demographic and address information
- Collect medical history
- Assess all eligibility criteria, including respiratory rate, chest-indrawing and pulse oximetry assessments (if not already documented in the medical record from that day) as well as a targeted physical examination
- Perform malaria rapid diagnostic testing (mRDT). Those who are found to have malaria will receive appropriate antimalarial treatment using artemisinin-based combination therapy in addition to the randomly assigned treatment for pneumonia
- Perform HIV rapid antibody testing if HIV status unknown
- Perform hemoglobin test (HemoCue®) for anemia

Note that if a child presents with wheezing (audible or auscultatory), study staff will administer a trial of rapid acting inhaled bronchodilator for up to three times, 15-20 minutes apart. Study staff will then assess for fast-breathing and chest-indrawing again to determine the child’s eligibility for this study.



715  
716 All screening procedures will be conducted by study staff, with the possible exception of the HIV rapid antibody  
717 test. HIV testing may be performed by either study staff or a team at KCH or BDH specially trained and experienced  
718 in pediatric HIV counseling and testing, whichever will reduce wait times for potential study participants and  
719 minimize disruption in regular care provision at KCH or BDH. Caregivers will be informed of all screening results  
720 during the screening visit, regardless of the eligibility status of their child.

721  
722 For those children who are not eligible, study staff will inform the caregiver(s) that their child will not be able to  
723 participate in the study and will receive standard care at KCH or BDH instead. Children less than 12 months of age  
724 or breastfeeding who are excluded based on an HIV-positive rapid antibody test result will be referred for  
725 confirmatory testing (e.g., dried blood spot filter paper test).

726  
727 All screening procedures will be documented in the appropriate study forms, including logs and case report forms.  
728 Clinical assessments and findings will also be documented in the child's medical record, as appropriate.

729  
730 • **Informed Consent**

731  
732 For the purposes of this protocol, "caregiver" refers to the legally authorized representative (LAR) of the child and  
733 informed consent may only be obtained from a child's LAR. Both mother and father are considered LARs for a  
734 child, so consent may be obtained from either parent. In the absence of a biological parent, documented proof of  
735 legal guardianship would be needed to establish a caregiver's status as a LAR.

736  
737 This study will have two informed consent forms (ICFs): one for screening procedures and one for enrollment  
738 procedures. Informed consent is the process of ensuring that caregivers of children fully understand what will and  
739 may happen to their children while participating in a research study. Study staff will administer a comprehension  
740 checklist to potential participants' caregivers prior to obtaining written informed consent to ensure that caregivers  
741 fully comprehend the nature of the study. The informed consent process continues throughout the study. Key study  
742 concepts will be reviewed periodically with the caregivers and the review will be documented. Additionally, if any  
743 new information is learned that may affect the caregiver's decision to stay in the trial this information will be shared  
744 with the caregivers in writing. All consent materials will be approved by the appropriate Institutional Review Board  
745 (IRB) and Independent Ethical Committee (IEC) prior to use.

746  
747 Refer to detailed description of informed consent procedures and ethical committee approval in Section 6 (Ethical  
748 Considerations and Consent).

749  
750 • **Enrollment Visit**

751  
752 After screening is complete, study staff will perform the enrollment visit procedures for the trial for only those  
753 children who are still eligible. For those children who are eligible, the following procedures are performed for  
754 enrollment:

- 755 ○ Administer comprehension checklist
- 756 ○ Obtain written informed consent for enrollment
- 757 ○ Perform a physical exam including vital signs and an assessment of any baseline characteristics not  
758 already recorded in the medical record or assessed during screening, including measurement of MUAC
- 759 ○ Collect vaccination history and additional socio-demographic information
- 760 ○ Collect locator information to be able to contact caregiver and conduct a home visit, if necessary
- 761 ○ Follow procedures for randomization assignment
- 762 ○ Provide the participant caregiver with the appropriate study product kits (described below).
  - 763 ■ A study nurse or clinician will prepare and administer the first drug dose, carefully instructing  
764 the caregiver how to administer subsequent doses appropriately. The caregiver will receive an  
765 instruction sheet with visual and text descriptions of the timing and dosing necessary to  
766 complete the treatment regimen. The pharmacists will be unblinded to the randomization  
767 allocation, but both provider and caregiver will be blinded to what the child will receive. The  
768 amoxicillin DT and placebo DT will appear and taste the same.
  - 769 ■ Children with fast-breathing will receive amoxicillin DT in two divided doses based on age  
770 bands (500 mg/day for children 2 months up to 12 months, 1000 mg/day for children 12

771 months up to 3 years, and 1,500 mg/day for children 3 years up to 5 years of age) for 3 days  
772 (control) or placebo DT in two doses based on age bands for 3 days (intervention).  
773 ○ Prescribe concomitant medications, as necessary (e.g., antimalarials if mRDT-positive).  
774

775 All enrollment procedures will be documented in the appropriate study forms. Clinical assessments and findings will  
776 also be documented in the child's medical record, as appropriate.  
777

#### 778 • **Randomization**

779  
780 Randomization and enrollment occur at the same study visit, designated Day 1. Randomization is defined as the  
781 process of assigning a child to a study arm; assignments are computer-generated by the Protocol Statisticians at UW.  
782 The study pharmacists on site will receive the randomization list from the Protocol Statisticians and will be  
783 responsible for recording the blinded portion of the randomization code on each study participant's case report  
784 forms and blister pack when they are enrolled and randomized. The list that contains a link between the allocation  
785 arm and the study participant ID will be maintained by the study pharmacists under lock and key and/or electronic  
786 encryption. Other study staff will not have access to the randomization list.  
787

788 Children will be randomized to placebo (intervention) or 3 days of oral amoxicillin DT (control). Treatments will be  
789 allocated in a 1:1 ratio. Study investigators and staff will be blinded to all elements of the randomization allocation  
790 for the duration of the study.  
791

#### 792 • **Management of Study Participants During Hospitalization**

793  
794 All children enrolled in the fast-breathing study (ITIP1) will be observed in the hospital ward for at least 2-8 hours  
795 before being assessed for discharge. Children with no fever and a respiratory rate below the enrolment respiratory  
796 rate threshold will be discharged after 2 hours; other children will remain under observation for longer. Children <6  
797 months of age, those with moderate malnutrition (11.5cm-13.5cm MUAC), and those febrile but with a negative  
798 mRDT will be initially admitted to the hospital overnight, to be assessed by study staff for discharge on the morning  
799 of Day 2.  
800

801 During discharge assessment, if a child's condition has deteriorated, they will be admitted to the hospital and  
802 counted as a treatment failure. Deterioration is defined as: the appearance of any WHO danger sign, oxygen  
803 saturation <90%, respiratory rate increased by 10 counts above baseline at enrollment assessment, or appearance of  
804 chest-in-drawing or other indication of severe pneumonia. During discharge assessment, if a child has an oxygen  
805 saturation <93% by pulse oximetry, a respiratory rate above the definition of very fast-breathing, or has developed  
806 additional respiratory symptoms, that child will remain in the hospital for continued monitoring. Continued  
807 monitoring in hospital will not be treated as prolonged hospitalization unless a child does not meet the criteria for  
808 discharge by the morning of Day 3. Once a child does meet the criteria for prolonged hospitalization, that child will  
809 be considered to have failed treatment. Note that due to logistical or social factors (e.g., caregiver not present, lack  
810 of transport options at that time of day), some children who meet discharge criteria might not leave the hospital right  
811 away. When confirmed by a study investigator, such children will not be classified as having prolonged  
812 hospitalization and will not qualify as failing treatment, so long as they do not meet any of the other treatment  
813 failure criteria.  
814

815 Children in the study will be primarily managed by study clinicians during any hospitalization, including ward  
816 rounds and clinical assessments. Diagnostic tests and medication for intercurrent illnesses will be ordered per ward  
817 protocols with results documented in study files. This includes antibiotic treatment regimen changes. To ensure  
818 adherence to study protocol, study staff will administer study drugs to participating children during any  
819 hospitalization. Study clinicians will be informed by hospital clinicians about the clinical care of children in the  
820 study and any clinical decisions made by hospital staff. Study staff will be responsible for orders in the event that  
821 study-related laboratory tests and specimen collection are required. The study will be responsible for costs incurred  
822 from any laboratory tests performed solely for study purposes. In addition to all study staff, all KCH clinicians and  
823 nurses will undergo GCP training.  
824

#### 825 • **Follow-Up Visits**

826

827 Target dates for follow-up visits are calculated from Day 1, the date of randomization. All visits must occur on the  
 828 calendar day on which they are initially scheduled or within 24 hours afterwards, with the exception for the Day 14  
 829 visit, which can occur either 2 days before or after day 14 and still be considered completed within the visit window.  
 830

831 Caregivers will bring their children for follow-up visits: Days 2, 3, 4, and 14. Table 1 highlights the study visits and  
 832 timing of study product administration.  
 833

834 On Days 1, 2, and 3, children will undergo an in-person visit in the morning and a phone call in the  
 835 afternoon/evening. The phone call will be conducted by study staff to ascertain the caregiver’s assessment of the  
 836 child’s condition and symptoms. Over the phone study staff will also remind caregivers to administer the second  
 837 dose of study product. If a child is in the hospital during the time period of an afternoon/evening phone visit, the  
 838 visit will be conducted in-person.  
 839

840 The Day 2 in-person study visit will occur while the child is still hospitalized for those children admitted overnight.  
 841 Prior to discharge, caregivers will be instructed on how and when to administer the study drug to their child as well  
 842 as how to contact the study site personnel for concerns that may arise between scheduled visits. Caregivers will  
 843 receive an instruction sheet with details on the timing and dosing necessary to complete the treatment regimen as  
 844 well as signs and symptoms that should prompt an immediate call to study staff. A study phone number will be  
 845 provided to each caregiver and will be answered 24/7.  
 846

847 If a child is not still in the hospital, study staff will attempt to contact the caregiver by phone prior to scheduled  
 848 study visits to remind them to return to the clinic at the appropriate time.  
 849

850 **Table 1.** Overview of study follow-up and product administration

|                  | Day 1                                                                                                                                    | Day 2                                                                                                                                        | Day 3                                                                                 | Day 4                                                               | Day 14                                                                             |
|------------------|------------------------------------------------------------------------------------------------------------------------------------------|----------------------------------------------------------------------------------------------------------------------------------------------|---------------------------------------------------------------------------------------|---------------------------------------------------------------------|------------------------------------------------------------------------------------|
| <b>Morning</b>   | <ul style="list-style-type: none"> <li>• Enrollment visit</li> <li>• Dose 1</li> <li>• Inpatient observation (for all)</li> </ul>        | <ul style="list-style-type: none"> <li>• Follow-up visit</li> <li>• Dose 3</li> <li>• Inpatient observation (for select children)</li> </ul> | <ul style="list-style-type: none"> <li>• Follow-up visit</li> <li>• Dose 5</li> </ul> | <ul style="list-style-type: none"> <li>• Follow-up visit</li> </ul> | <ul style="list-style-type: none"> <li>• Follow-up visit and study exit</li> </ul> |
| <b>Evening</b>   | <ul style="list-style-type: none"> <li>• Phone call</li> <li>• Dose 2</li> <li>• Inpatient observation (for select children*)</li> </ul> | <ul style="list-style-type: none"> <li>• Phone call</li> <li>• Dose 4</li> </ul>                                                             | <ul style="list-style-type: none"> <li>• Phone call</li> <li>• Dose 6</li> </ul>      |                                                                     |                                                                                    |
| <b>All hours</b> | 24-hour hotline number to call                                                                                                           |                                                                                                                                              |                                                                                       |                                                                     |                                                                                    |

851 \*\*Children <6 months of age, with moderate malnutrition (MUAC 11.5cm-13.5cm), or with fever but a  
 852 negative malaria rapid diagnostic test (mRDT).  
 853

854 Follow-up visit procedures at scheduled in-person visits include the following:

- 855 ○ Review/update locator information
- 856 ○ Review results from prior visits
- 857 ○ Collect medical history since the last study visit
- 858 ○ Perform physical exam including respiratory rate, chest-inrawing and pulse oximetry assessments to
- 859 assess for treatment failure or clinical relapse
- 860 ○ For all visits EXCEPT Day 14 visit:
  - 861 ▪ Collect study product adherence information from caregiver
  - 862 ▪ Review drug dosing and administration procedures with caregiver
- 863 ○ At the outcome assessment visit (Day 4):
  - 864 ▪ Conduct pill counts of study product and document unused amounts
  - 865 ▪ Collect all unused study product from the caregiver

866 Follow-up visit procedures at scheduled phone call include the following:

- 867 ○ Review/update locator information
- 868 ○ Collect medical history since the last study visit, including adherence information
- 869 ○ Remind caregiver to administer second dose of study product
- 870

871           ○ Remind caregiver of the next study appointment

872  
873 For adherence, note that completing 80% of all scheduled dose administrations is considered to meet treatment  
874 completion criteria (i.e., 5 out of 6 doses over the 3 days). If doses are missed due to non-adherence, no study action  
875 will be taken beyond documenting the missed doses and counseling the caregiver on adherence and study product  
876 administration. If a child vomits within 30 minutes of a dose, one repeat dose may be attempted. If a child vomits  
877 within 30 minutes after 2 or more scheduled (i.e., not repeat) dose administrations, this will be considered a  
878 treatment failure and that child will be referred to care for a work-up of the vomiting cause and will be prescribed a  
879 course of second-line antibiotics.

880  
881 All follow-up visit procedures will be documented in the appropriate study forms. Clinical assessments and findings  
882 will also be documented in the child’s medical record, as appropriate.

883  
884 • **Missed Visits**

885  
886 In case of a no-show at the clinic for a scheduled in-person study visit, study personnel will call the caregiver and  
887 visit the child’s home either that afternoon or the following day, to conduct the study visit. If study staff is unable to  
888 reach a caregiver by phone for a scheduled phone call, at least two repeat attempts will be made in 20 minute  
889 intervals. If contact has still not been made with a caregiver, study staff will call the contact(s) that the caregiver  
890 listed at enrollment in order to track down the caregiver that same calendar day. Maximum efforts will be made to  
891 ensure complete follow-up in the trial. For children who do not complete a scheduled visit within the visit window,  
892 that visit will be documented as “missed” but study staff will still attempt to complete the appropriate assessments  
893 from that visit, if possible (e.g., Day 4 visit performed and documented on Day 9).

894  
895 Children who miss a visit, for other than a protocol-mandated reason for discontinuation, are permitted to continue  
896 with any subsequent study treatments that can still be scheduled in the time interval specified by the protocol.

897  
898 Based on our current experience, we expect that fewer than 5% of the children will be lost to follow-up at the time  
899 of primary outcome assessment. We think it is unlikely that attrition rates will differ between randomization groups.

900  
901 • **Interim Contacts and Visits**

902  
903 Interim contacts and visits (those between regularly scheduled follow up visits) may be performed at caregiver  
904 request or as deemed necessary by the site investigators or designee at any time during the study. All interim  
905 contacts and visits will be documented in the child’s study records and on applicable case report forms (CRF).  
906 Interim visits may occur at the study clinic or at the child’s home.

907  
908 Study staff will assess the child for treatment failure or clinical relapse at all interim visits. Study staff will  
909 encourage caregivers to call the 24/7 study hotline if they observe any symptoms of concern in their child.

910  
911 • **Therapy for Treatment Failure and Clinical Relapse**

912  
913 If a child is determined to have treatment failure on or before Day 4 or clinical relapse between Day 4 and Day 14,  
914 he or she will be hospitalized and will receive second-line therapy. At KCH, standard of care for children failing oral  
915 amoxicillin is to receive benzyl penicillin and gentamycin. Enrolled children failing treatment or experiencing  
916 clinical relapse will receive this regimen as inpatients, regardless of their randomization allocation.

917  
918 • **Withdrawal and Early Termination**

919  
920 Children and their caregivers may voluntarily withdraw from the study for any reason at any time. The site  
921 investigators may also withdraw children from the study in order to protect their safety if, in the investigators’  
922 opinion, continuing participation would jeopardize the child’s health. Any participant withdrawal or early  
923 termination will be documented in the appropriate study forms.

924  
925 Any child withdrawn from the study will be referred to care with the recommendation that the child receive a full  
926 course of treatment with oral amoxicillin, according to the local standard of care.

927  
928  
929  
930  
931  
932  
933  
934  
935  
936  
937  
938  
939  
940  
941  
942  
943  
944  
945  
946  
947  
948  
949  
950  
951  
952  
953  
954  
955  
956  
957  
958  
959  
960  
961  
962  
963  
964  
965  
966  
967  
968  
969  
970  
971  
972  
973

- **Study Termination Visit**

The Day 14 visit will serve as the study termination visit for the trial. Procedures for this visit, in addition to the standard follow-up visit procedures described above, include the following:

- Collect any unused study product from caregiver, if not retrieved at prior study visit
- Refer child to clinical care, as needed
- Document contact in child’s study records

- **Biohazard Containment**

As exposure to blood-borne pathogens can occur through contact with contaminated needles, blood, and blood products, appropriate blood and secretion precautions will be employed by all personnel in the HIV, anemia, and malaria testing for this study as recommended by the U.S. Centers for Disease Control. Biohazardous waste will be contained according to institutional, transportation/carrier, and all other applicable regulations.

## **STUDY PRODUCTS**

- **Presentation and Formulation**

Prepared study product will be labeled by the manufacturer so as to maintain the blind; both the amoxicillin DT packages and the placebo DT packages will have the same printed information (e.g., “ITIP Study Product - dispersible tablets 250 mg”). This is a double-blinded study in which the study drug assignment will be concealed from the child, caregivers, and study personnel (with the exception of the study pharmacists and the Protocol statisticians). Labels will meet all national and local requirements. The label must also include the product expiry date, batch number, manufacture date.

For this study, amoxicillin DT is supplied as round, orange, uncoated tablets that contain 250 mg of amoxicillin and inactive ingredients. The placebo formulation for this study is a dispersible tablet that appears, tastes, smells, and disperses indistinguishably from the amoxicillin DT, although it is composed of only the inactive ingredients.

Study drug (amoxicillin DT and placebo DT) will be supplied in bulk shipments by a Sponsor-contracted drug manufacturer to the study site. Active drug and placebo pills will be sent in separate shipment packaging to avoid any mis-identification on the part of the study pharmacists, the only un-blinded study staff members in Malawi. The study pharmacists will prepare study product kits in batches based on the stratified randomization list. The amoxicillin DT and placebo DT will be individually labeled by the study pharmacists with each child’s participant ID number printed on self-adhesive sticking labels. Different ID sequences and/or label colors will be used for the three age bands to minimize the chances of a prescription error. The link between the participant ID numbers and randomization code will be kept securely by the study pharmacists.

Amoxicillin DT is commercially available in blister packs containing 10 tablets per blister pack. Each child’s study product supply will be re-packaged by the study pharmacists in kits based on the child’s age band and randomization allocation. Each kit will represent the entire study product supply for one child. A supply of 3 days-worth of study product will be dispensed based on the child’s age band (refer to Table 2 below). Each child’s kit will consist of either all placebo or all amoxicillin, based on randomization arm.

**Table 2.** Study Product Kits of Amoxicillin DT or Placebo DT to be taken twice daily

| <b>Age Band</b>          | <b>No. of tablets provided</b> |
|--------------------------|--------------------------------|
|                          | <b>Days 1-3</b>                |
| 2 months up to 12 months | 6                              |
| 12 months up to 3 years  | 12                             |
| 3 years up to 5 years    | 18                             |

974  
975  
976

977  
978  
979  
980  
981  
982  
983  
984  
985  
986

- **Preparation and Administration**

The amoxicillin DT will be provided in 250 mg doses according to the age bands noted in Table 3 and will be administered orally to the child in divided doses twice daily by dispersing in a small amount of clean water or breast milk.

**Table 3.** Study Product Administration by Age Band

| Age Band                 | Oral Amoxicillin/Placebo Dispersible Tablets (DT) |                                          |
|--------------------------|---------------------------------------------------|------------------------------------------|
|                          | No. of 250 mg tablets, given two times daily      | Total study product administered per day |
| 2 months up to 12 months | 1                                                 | 500 mg                                   |
| 12 months up to 3 years  | 2                                                 | 1,000 mg                                 |
| 3 years up to 5 years    | 3                                                 | 1,500 mg                                 |

987  
988  
989  
990  
991  
992  
993  
994  
995  
996  
997  
998  
999  
1000  
1001  
1002  
1003  
1004  
1005  
1006

Study drug will be maintained and dispensed to the participant caregiver by a study pharmacist. As noted above, the study pharmacists will package tablets received as bulk study drug. Tablets will be used as supplied, meaning that other than packaging and labeling, there is no further study drug preparation required. Study drug is administered orally in either clean water or breast milk, as appropriate. For breast milk administration, the mother will need to express at least 5-10 ml of breast milk into a clean container before dispersing the study product into the liquid. If a mother is unable or unwilling to express milk at the time of study drug administration, clean water can be used instead. For dispersal of study product in water, at least 5-10 ml of bottled, filtered or boiled water can be used in a clean container. Once placed in the liquid, the tablet should be allowed to completely disperse (after at least one minute) before providing the solution to the child to drink. Flavoring agent may be added to the liquid, if desired.

All children, caregivers and research staff will be blinded as to whether the child is in the amoxicillin DT or placebo DT treatment group until the end of the study once the decision to break the study blind is determined by the Sponsor (after completion of study primary manuscript). Codes linking randomization number for each child to actual treatment will be secured in a sealed, opaque envelope and maintained in a locked drawer in the research pharmacy.

Caregivers will be given the emergency contact number for the study personnel during the consenting process in order to report any AEs.

- **Stability and Storage**

All study product not already dispensed to children will be stored in locked cabinets only accessible to the study pharmacists, study clinician, and investigators. The study product does not need to be refrigerated and will be stored in a dry location at ambient room temperatures below 25° C (77° F). Study product will be dispensed to participant caregivers as participant-specific kits by the study pharmacists and documented as such.

- **Accountability and Disposal**

The study pharmacists are required to maintain complete records of all study products received from the Sponsor and/or drug manufacturer and will be responsible for maintaining an accurate record of the randomization codes, inventory, and an accountability record of amoxicillin DT and placebo supplies for this study. The study pharmacists will also be responsible for ensuring the security of these documents, maintaining them under lock and key and/or electronic encryption. Partially used amoxicillin DT and placebo will not be used for human administration.

1014  
1015  
1016  
1017  
1018  
1019  
1020  
1021  
1022  
1023  
1024

At the completion of the study, the study pharmacists and site investigators (or designee) will conduct and document a final reconciliation of all study product shipped, received, dispensed, consumed, and remaining. Any discrepancies identified will be investigated, resolved, and documented before any unused study drug is destroyed. After all

1025 accounting and reconciliation procedures are complete and approved by the Sponsor, all unused study product will  
1026 be destroyed on site and documented in the master study files.

1027

## 1028 **DATA COLLECTION**

1029

1030 Clinical research data will be maintained through a combination of secure electronic data management system and  
1031 physical files with restricted access. Data related to study endpoints will be extracted from the electronic databases  
1032 for statistical analysis. Three distinct study databases will be created and maintained: the primary study database  
1033 with study visit data, a safety database with serious adverse event (SAE) assessments, and a database with  
1034 participating children’s personally identifiable information. The first two study databases containing study endpoint  
1035 data will identify children only by study identification numbers and will not contain identifying information such as  
1036 name, address, medical record number or personal contact information. In the third database, the study coordinator  
1037 will maintain a log that will contain the link between personal identifiers and the study participant IDs. The linklog  
1038 and any other documentation (paper-based or electronic) that has both personal identifiers and the participant ID will  
1039 have restricted access and will be stored in a secure manner separately from other study data and will be retained for  
1040 at least five years after the last participating child exits the study.

1041

- 1042 • **Case Report Forms**

1043

1044 All study data will be collected by the clinical study staff using designated source documents or paper-based case  
1045 report forms (CRFs). Study data will be entered directly into the CRFs during a study visit. Data from the paper-  
1046 based CRFs will be entered after the fact into the electronic database as promptly as is feasible. Study staff will  
1047 maintain source documents for each child at the study site. Source documentation will be available for review to  
1048 ensure that the collected data are consistent with the CRFs. CRFs and laboratory reports will be reviewed by the site  
1049 clinical team who are responsible for ensuring that they are accurate and complete. CRFs, source documents and  
1050 other supporting documents (both electronic and paper-based) will be kept in a secure location and remain separate  
1051 from participant identification information (name, address, etc.) to ensure confidentiality. Standard Good Clinical  
1052 Practices (GCP) practices will be followed to ensure accurate, reliable and consistent data collection.

1053

- 1054 • **Source Documents**

1055

1056 Source documents include but are not limited to:

1057

- 1057 ○ Signed informed consent forms
- 1058 ○ Documentation of the comprehension checklist
- 1059 ○ Visit documentation that includes dates of study visits
- 1060 ○ Receipts for travel reimbursement
- 1061 ○ Reported laboratory results
- 1062 ○ Clinic notes

1063

1064 A copy of all laboratory results will also be included in the child’s medical records. Site investigators will maintain,  
1065 and store in a secure manner, all source documents throughout the study. These documents will be retained for at  
1066 least five years after the last child exits the study.

1067

## 1068 **DATA MANAGEMENT**

1069

1070 Primary data management activities will be undertaken by the designated contract research organization (CRO). The  
1071 on-site study data manager will oversee data-related procedures at the study site and will be supervised by the CRO  
1072 data management staff. Data management activities include data entry and validation, data coding and cleaning,  
1073 database quality control, disaster recovery plans, AE reporting and tracking systems, preparation and submission of  
1074 safety and compliance reports to the Sponsor, and preparation of final study database. Data management activities  
1075 will be performed using Clindex® Clinical Trial and Data Management software, developed by Fortress Medical  
1076 Systems.

1077

- 1078 • **Data Access**

1079

1080 The participating site will maintain appropriate medical and research records for this trial, in compliance with  
1081 International Conference on Harmonization Good Clinical Practice E6 (ICH-GCP), regulatory, sponsoring  
1082 organization and institutional requirements for the protection of confidentiality of children. The site will permit  
1083 authorized representatives of the Sponsor and regulatory agencies to examine (and when required by applicable law,  
1084 to copy) clinical records for the purposes of quality assurance reviews, audits and evaluation of the study safety and  
1085 progress. User-specific usernames and passwords are required to log onto the database. User rights will be provided  
1086 to study staff, PIs, and co-investigators at the level appropriate for each individual's job description.  
1087

1088 • **Data Storage**  
1089

1090 The site investigators and designees will maintain, and store securely, complete, accurate and current study records  
1091 throughout the study. In accordance with regulations, study staff will retain all study records on site for at least five  
1092 years after study closure. Study records will not be destroyed prior to receiving approval for record destruction from  
1093 the Sponsor. Applicable records include source documents, site registration documents and reports, informed  
1094 consent forms, and notations of all contacts with the child.  
1095

1096 The Clindex® database is hosted by Fortress Medical Systems through their Software as a Service platform and  
1097 accessed remotely online. All of the servers that host the Clindex® software and data are housed at ATOMICdata, a  
1098 Tier 3, SOC 3 Certified Data Center. The primary hosting facility is at the ATOMICdata Minneapolis South facility.  
1099

1100 • **External Study Monitoring**  
1101

1102 The Study Sponsor and other regulatory authority inspectors or their authorized representatives are responsible for  
1103 contacting and visiting the study site for the purpose of inspecting the facilities and, upon request, inspecting the  
1104 various records of the trial. Participant confidentiality will be respected. Site monitoring visits will be conducted to  
1105 assess compliance with ICH-GCP guidelines. Study monitors will visit the site to:

- 1106 ○ Verify compliance with human subjects and other research regulations and guidelines
- 1107 ○ Assess adherence to the study protocol and study-specific procedures manual
- 1108 ○ Confirm the quality and accuracy of information collected at the study site and entered into the study  
1109 database
- 1110 ○ Assess the resolution of any past or ongoing issues identified at previous monitoring visits  
1111

1112 The site investigators will allow study monitors to inspect study facilities and documentation (e.g., informed consent  
1113 forms, clinic and laboratory records, other source documents, case report forms), as well as observe the performance  
1114 of study procedures. Medical records containing identifying information may be made available for review when the  
1115 study is monitored by the Sponsor or an authorized regulatory agency. Direct access may include examining,  
1116 analyzing, verifying, and reproducing any records and reports that are important to the evaluation of the study. Site  
1117 visit logs will be maintained at the study site to document all visits.  
1118

1119 **SAFETY ASSESSMENTS AND REPORTING**  
1120

1121 • **Safety Monitoring**  
1122

1123 This protocol has extensive safety monitoring in place. The study site investigators will be responsible for close  
1124 safety monitoring of all children participating in the study, and for alerting the protocol team if unexpected concerns  
1125 arise. All children will undergo a targeted physical exam at screening and enrollment to ensure that children are  
1126 medically stable and do not demonstrate any exclusion criteria. Children most at risk for treatment failure will be  
1127 initially hospitalized overnight to ensure initial continuous and careful monitoring by hospital staff. Each  
1128 participating child will be evaluated by a study clinician at each in-person study visit. If a child misses an in-person  
1129 study visit, home visits will be conducted by trained study staff to ensure clinical evaluation. For the first three days  
1130 of the study, participants will have twice-daily contact with study staff to monitor their health and ensure study  
1131 product adherence. Every effort will be made to trace all children in the study for the final outcome assessment. An  
1132 emergency number will be provided to all participants' caregivers so that an on-call clinician can be reached at any  
1133 time during study participation. As needed, children in the study may be evaluated at interim visits and/or referred  
1134 for additional care. These "safety net" procedures are intended to identify all instances of potential treatment failure  
1135 and clinical relapse so that those children failing treatment can be provided appropriate antibiotics and clinical care.



1136  
1137 SAEs will also be regularly reviewed by the study’s CRO safety monitor and medical expert and compiled into  
1138 reports for the protocol team. The protocol team may seek independent expert medical opinion as the need arises. In  
1139 addition, an external group, the Data Safety and Monitoring Board (DSMB) will be closely involved in regular  
1140 safety monitoring, as described below in more detail.

1141  
1142 • **Data Safety and Monitoring Board (DSMB)**  
1143

1144 An independent DSMB will be set up to regularly (approximately every 3 months) review cumulative safety and  
1145 study conduct data. At a minimum, safety data presented to the DSMB will include summaries of data on AEs,  
1146 SAEs, adherence rates, treatment failure, and clinical relapse. The DSMB will include at least one pediatrician, one  
1147 pneumonia expert, and one biostatistician. As the interim analyses are available, the DSMB will review interim  
1148 comparisons of the trial arms after enrollment has begun. The content, format and frequency of safety data reports  
1149 will be agreed upon by the protocol team and the DSMB in advance of study implementation, to be documented in a  
1150 DSMB charter. The DSMB may review the unblinded treatment regimens of individuals, if warranted. The DSMB  
1151 reviews will be summarized with recommendations to the study Sponsor, as to whether or not there are safety  
1152 concerns and if the study should continue without change, be modified, or terminated.

1153  
1154 In the unlikely event that the protocol team has serious safety concerns that lead to a decision to discontinue study  
1155 product allocation for all children in the study and stop accrual into the study, the protocol team will request an  
1156 emergency review of the data by the DSMB before recommending that the study be permanently stopped. At the  
1157 protocol team’s request, accrual into the study may be temporarily halted before the DSMB has the opportunity to  
1158 review the relevant data by treatment arm.

1159  
1160 • **Adverse Events**  
1161

1162 Per ICH GCP guidelines, an AE is “any untoward medical occurrence in a patient or clinical investigation subject  
1163 administered a pharmaceutical product and which does not necessarily have a causal relationship with this treatment.  
1164 An AE can therefore be any unfavorable and unintended sign (including an abnormal laboratory finding), symptom,  
1165 or disease temporally associated with the use of a medicinal product, whether or not related to the medicinal  
1166 product.” These come to the attention of site clinicians through interim medical histories, physical examinations and  
1167 laboratory testing. Study participants’ caregivers will be instructed to contact the study site staff to report any AEs  
1168 they may experience. In the case of a life-threatening event, they will be instructed to seek immediate emergency  
1169 care. Where feasible and medically appropriate, participant caregivers will be encouraged to seek medical care for  
1170 their children where the study clinician is based, and to request that the clinician be contacted upon their arrival.

1171  
1172 All AEs will be managed by the clinical study site team in accordance with good medical practices and the standard  
1173 clinical practices in place at the hospital. The clinical team will assess and treat or refer the participating child for  
1174 medical care as appropriate, which may include additional study visits, if necessary. If any acute treatment or  
1175 medical care is required as a result of harm caused by a study product or study procedure, this care will be provided  
1176 by the site free of charge. All children in the study with an AE will be followed clinically until the AE resolves  
1177 (returns to baseline) or stabilizes.

1178  
1179 The protocol team anticipates AEs, both severe and non-severe, to occur among enrolled children at a similar rate as  
1180 untoward medical events occur in comparable pediatric populations outside of a research setting. AEs that the study  
1181 team expects may occur during the research include, but are not limited to: adverse reactions to amoxicillin (e.g.,  
1182 skin rash), onset of pneumonia-related symptoms (e.g., fever), and onset of other common and uncommon childhood  
1183 illnesses (e.g., diarrhea, measles). The protocol team expects the vast majority of AEs in this study to be classified as  
1184 “not related,” “probably not related,” or “possibly related” to the study product (see section titled “Adverse Event  
1185 Relationship to Study Product” below).

1186  
1187 • **Serious Adverse Event**  
1188

1189 SAEs will be defined per US 21 Code of Federal Regulations (CFR) 312.32 guidelines, or the equivalent Malawi  
1190 regulations, as AEs occurring that:

- 1191 ○ Result in death

- 1192 ○ Are life-threatening AEs
- 1193 ○ Require inpatient hospitalization or prolongation of existing hospitalization
- 1194 ○ Result in persistent or significant disability/incapacity, or
- 1195 ○ Are congenital anomalies/birth defects.

1196  
1197 Important medical events that may not result in death, be life-threatening, or require hospitalization may be  
1198 considered serious when, based upon appropriate medical judgment, they may jeopardize the health of the  
1199 participating child or require medical or surgical intervention to prevent one of the outcomes listed above.

1200  
1201 Note that the initial hospitalization for children under 6 months of age, with moderate malnutrition, or with a  
1202 negative mRDT and fever does not count as an SAE as the condition for which the child was hospitalized occurred  
1203 prior to administration of the study product, classifying it as a pre-existing condition and not an AE. If that initial  
1204 hospitalization is prolonged past the expected duration overnight because the child's health has deteriorated, it will  
1205 be reported as an SAE. Any readmission to the hospital will also be reported as an SAE. Please refer to Section 4.6  
1206 on Study Procedures, specifically the portion titled "Management of Study Participants During Hospitalization," for  
1207 further detail on continued monitoring in hospital and the definition of deterioration.

1208  
1209 All treatment failures will be considered SAEs.

1210  
1211 • **Adverse Event Relationship to Study Product**

1212  
1213 The relationship of all AEs to study product will be assessed as follows:

- 1214 ○ Definitely related: AE and administration of study agent are related in time, and a direct association can be  
1215 demonstrated with the study agent.
- 1216 ○ Probably related: AE and administration of study agent are reasonably related in time, and the AE is more  
1217 likely explained by the study agent than by other causes.
- 1218 ○ Possibly related: AE and administration of study agent are reasonably related in time, and the AE can be  
1219 explained equally well by causes other than the study agent.
- 1220 ○ Probably not related: a potential relationship between administration of study agent and AE could exist, but  
1221 is unlikely, and the AE is most likely explained by causes other than the study agent.
- 1222 ○ Not related: the AE is clearly explained by another cause unrelated to administration of the study agent.  
1223 Reportable events must have documentation to support the determination of "not related."

1224  
1225 The assessment for AE relationship to study product must be conducted while the reviewer is blinded to  
1226 randomization allocation for the child in question.

1227  
1228 The initial determination of AE relationship to study product will be made by study staff with as needed consultation  
1229 with the local PI. An internal medical officer will review determinations of AE relationship and assign the final  
1230 relationship determination for all Grade 4 and 5 events, including all SAEs. For any death in the study, an  
1231 independent medical officer will make the final determination of relationship to study product.

1232  
1233 • **Grading Severity of Events**

1234

1235 All AEs will be graded by the widely used DAIDS AE Grading Table Version 1.0, December 2004; clarification  
1236 August 2009. This grading table is now adopted by the U.S. Food and Drug Administration (U.S. FDA) for AE  
1237 reporting. This table is available at: [http://rcc.tech-  
1238 res.com/Document/safetyandpharmacovigilance/Table\\_for\\_Grading\\_Severity\\_of\\_Adult\\_Pediatric\\_Adverse\\_Events.  
1239 pdf](http://rcc.tech-res.com/Document/safetyandpharmacovigilance/Table_for_Grading_Severity_of_Adult_Pediatric_Adverse_Events.pdf)

1240  
1241 • **Safety Reporting**

1242  
1243 All SAEs must be reported by the site to the medical officers and Sponsor within 24 hours. Attribution with regard  
1244 to relationship to study product will only be reported for AE grades 2 or above and for all SAEs. Prior to study  
1245 unblinding, any Grade 4 local or systemic reactogenicity symptom or AE, described by the site staff as possibly,  
1246 probably, or definitely related to the study product, or any Grade 5 event requires immediate notification by the site  
1247 to the study coordinator and co-PIs. The co-PIs will convene within 24 hours by teleconference and decide whether

1248 the event necessitates a pause in further enrollment. If the team cannot convene to review the event within 24 hours,  
1249 the medical officer will make the final decision.

1250  
1251 Any death in the study will precipitate immediate action. To be completed within 24 hours, in the following order:  
1252 1. Study staff will report the death to the medical officers (internal and independent) and Sponsor.  
1253 2. The pharmacists and biostatisticians will be notified of the need for emergency unblinding procedures  
1254 for that child.  
1255 3. If the child is found to be in the placebo arm of the study, enrollment into the study will be  
1256 automatically stopped.  
1257 4. If the child is found to be in the treatment arm of the study, the death will be treated like all other  
1258 SAEs.

1259  
1260 Reporting requirements for the IRB/IEC will be followed as appropriate.  
1261

1262 • **Study Discontinuation**  
1263

1264 The trial may be discontinued at any time by the protocol team, Sponsor, funding agency, Malawi regulatory  
1265 authorities, or institutional review board/ethics committee. Please refer to Section 5.1 on Data Analysis, specifically  
1266 the section on Analytical Methodology for Interim Analyses for more detail on the decision to discontinue the trial  
1267 for safety.  
1268

1269 **STATISTICAL DESIGN AND ANALYSIS**  
1270

1271 **DATA ANALYSIS**  
1272

1273 • **Overview and General Design**  
1274

1275 In brief, we plan to conduct a facility-based, double-blinded, individually randomized, non-inferiority trial of  
1276 placebo (intervention) versus 3 days (control) of oral amoxicillin DT for fast-breathing pneumonia.  
1277

1278 The study will include 2,000 HIV-1 seronegative children aged 2 to 59 months presenting with fast-breathing  
1279 pneumonia at KCH or BDH in Lilongwe, Malawi. The treatment groups will include treatments with placebo two  
1280 times a day for 3 days versus oral amoxicillin DT in two divided doses for 3 days. Doses will be based on age bands  
1281 (500 mg/day for children 2 months up to 12 months, 1000 mg/day for children 12 months up to 3 years, and 1,500  
1282 mg/day for children 3 years up to 5 years of age). Treatment will be block randomized (with concealed block size) to  
1283 ensure a 1:1 ratio of intervention and control.  
1284

1285 • **Randomization and Blinding Procedures**  
1286

1287 Randomization will be performed as 1:1 based on permuted blocks of concealed size within strata defined by age  
1288 groups (2 up to 12 months, 12 up to 36 months, 36 up to 59 months). Three randomization lists (one for each age  
1289 group) will be provided by the statisticians to the study pharmacy. The study pharmacists and the Protocol  
1290 Statisticians will be the only individuals who have access to the treatment assignment for each study patient.  
1291 Patients, their caregivers and all other study personnel will remain blinded during the course of the study until the  
1292 primary results manuscript is finalized.  
1293

1294 The only type of emergency situation where unblinding a child's randomization allocation would be necessary is in  
1295 the case of a child death that is "probably not," "possibly," "probably" or "definitely" related to study product. The  
1296 study pharmacists and biostatisticians will have access to the randomization list to identify a particular child's  
1297 treatment allocation arm. In this scenario, and any unanticipated need to unblind a child's randomization allocation  
1298 for reasons of participant safety during the course of the study, the site investigators, Sponsor, and IRB/IEC will be  
1299 notified and the instance will be documented.  
1300

1301 • **Objectives and Endpoints**  
1302

1303 The primary null hypothesis will be that the primary outcome of treatment failure at 4 days in those who received  
1304 placebo is inferior (non-inferior in the alternative hypothesis) to those who received amoxicillin DT when used for 3  
1305 days for the treatment of fast-breathing pneumonia in children aged 2–59 months. Eligible children will be randomly  
1306 assigned to receive placebo twice daily for 3 days in the intervention group and oral amoxicillin DT twice daily for 3  
1307 days in the control group. The children will be evaluated on day 4, after 3 days of treatment, to assess treatment  
1308 failure because by this time point they would have received all their treatment and we would expect them to either  
1309 be cured or to have failed treatment. They will be evaluated on days 2, 3, and 14 to assess response to treatment. If a  
1310 child becomes ill again, that child will be encouraged to return between days 4 and 14 to assess for relapse. Children  
1311 who do not respond to treatment, develop adverse reactions to the study drug, or withdraw from the study will be  
1312 treated according to Malawian standard guidelines.  
1313

1314 The primary outcome will be treatment failure before or on day 4 for intervention and control groups. Secondary  
1315 outcomes include: (a) clinical relapse between days 4 and 14 if treatment failure was not present before or on day 4,  
1316 (b) combined rates of clinical relapse and treatment failures before or on day 14, (c) prevalence of malaria among  
1317 children with cough and/or difficulty in breathing AND fever, (d) differential treatment response among children  
1318 with wheeze at screening, and (e) differential treatment failure by age. Refer to Section 3 on Hypothesis, Objectives,  
1319 and Endpoints for full description of all objectives.  
1320

- 1321 • *Treatment failure* will be defined as development of any of the following criteria during the specified time  
1322 periods:
  - 1323 ○ Any time before or on day 4: WHO IMCI danger signs, severe respiratory distress (e.g., grunting, nasal  
1324 flaring, head nodding, or severe chest-indrawing), oxygen saturation by pulse oximetry < 90%, chest-  
1325 indrawing, missing 2 or more dose administrations due to vomiting, change in antibiotics prescribed by  
1326 a study clinician, hospitalization due to pneumonia (if not initially admitted), prolonged hospitalization  
1327 or re-admission due to pneumonia (if initially admitted), or death.
  - 1328 ○ At day 4 outcome assessment: documented axillary temperature  $\geq 38^{\circ}\text{C}$  in the absence of diagnosed  
1329 co-infection with fever symptoms (e.g., malaria).
  - 1330 ○ For the purposes of this protocol, children who do not fail on assessment at day 4 will be considered  
1331 clinically cured. Loss to follow-up or withdrawal from the study at any time after enrollment and  
1332 before the day 14 follow-up visit will be considered missing outcome data for that respective time  
1333 point.
- 1334 • *Clinical relapse* will be defined as recurrence of signs of pneumonia or severe disease after day 4 among  
1335 those who did not have treatment failure at or by day 4.  
1336

1337 Recruitment and follow-up is expected to continue until the maximum sample size is achieved. We are assuming  
1338 that a total of 2,000 children (1,000 per treatment group) will be enrolled. We chose a relative non-inferiority margin  
1339 for the fast-breathing study (rather than an absolute failure rate) because there is higher uncertainty regarding the  
1340 failure rate for fast-breathing pneumonia and because a more conservative approach to the non-inferiority margin for  
1341 smaller failure rates was assumed to be acceptable to policymakers and stakeholders for a study of pneumonia that  
1342 includes a placebo treatment group. Figure 2 shows the maximum true failure rate in the placebo treatment group in  
1343 reference to various possible failure rates in the amoxicillin DT treatment group and a 1.5 relative non-inferiority  
1344 margin (50% relative increase in failure rate) that would result in a 95% confidence interval at maximum enrollment  
1345 which excludes the non-inferiority margin. The figure also indicates the power the study has to show non-inferiority  
1346 if the failure rates are exactly the same in the two treatment groups for various possible failure rates. Of note, the  
1347 estimated power is adjusted for a 5% loss to follow-up rate in each of the arms. This is considered conservative with  
1348 respect to the multiple imputation procedure that will be used to account for missing outcome values.  
1349  
1350

1351  
1352

**Figure 2.** Fast-breathing pneumonia failure rates

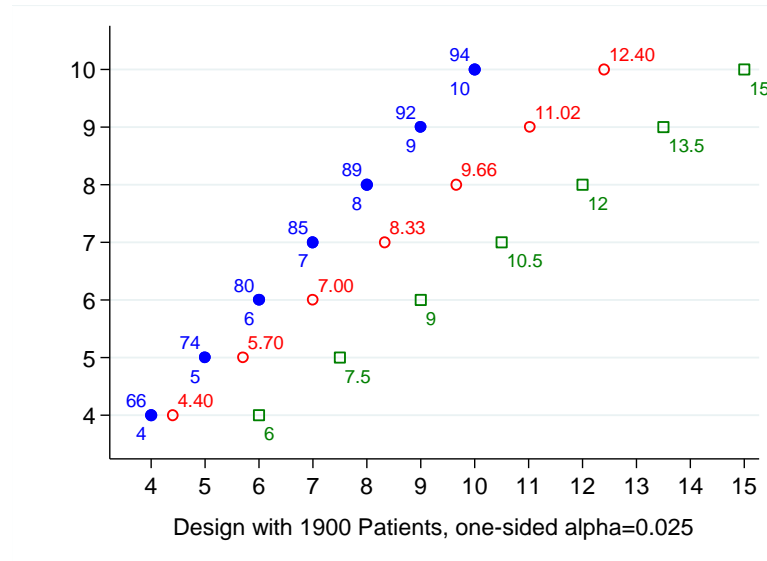

1353

Note:

1354  
1355  
1356  
1357  
1358  
1359  
1360  
1361  
1362  
1363  
1364  
1365  
1366  
1367  
1368  
1369

- Blue, solid circles, blue number below = potential failure rates for the amoxicillin DT treatment group.
- Blue, hollow circles, blue number above = Power to detect the alternative of exactly equal failure rates in both treatment groups
- Green, hollow squares = a 1.5 relative non-inferiority margin. For example, for a failure rate of 7%, the non-inferiority margin is 7%\*1.5 = 10.5%; for a failure rate of 10%, the non-inferiority margin is 10%\*1.5 = 15%.
- Hollow, red circles: maximum true failure rate for the placebo treatment group observed at enrollment of 1,900 children (950 children in each control and treatment groups) to rule out an increase in failure rate as large as the non-inferiority margin. For example, for a failure rate of 7% in the amoxicillin DT treatment group, the true failure rate in the placebo treatment group can be as large as 8.33% (1.33% above the amoxicillin DT treatment group) and can still rule out a failure rate of 10.5% in the placebo treatment group with a 95% confidence interval at maximum enrollment.

1370  
1371  
1372  
1373  
1374  
1375

Prior to the interim analysis we will be considering the potential to increase the sample size of the study based on a blinded examination of the overall failure rate to ensure maintaining a pre-specified level of power. We will calculate the overall treatment failure rate at a time prior to the planned interim analysis to avoid introducing bias. Table 4 provides potential sample sizes that might be considered in relationship to the failure rate and power of the study. Details of this adaptive design will be provided in the statistical analysis plan (SAP).

1376  
1377  
1378

**Table 4.** Required total sample sizes (mostly rounded to full 100s) for lower failure rates in the amoxicillin DT group to achieve 80%, 85% and 90% power for the alternative of exactly the same failure rates in the two groups (ITIP1)

| Failure rate in amoxicillin DT group | 80%  | 85%  | 90%  |
|--------------------------------------|------|------|------|
| 4%                                   | 3100 | 3700 | 4400 |
| 4.5%                                 | 2800 | 3200 | 3900 |
| 5%                                   | 2500 | 2900 | 3500 |

|      |      |      |      |
|------|------|------|------|
| 5.5% | 2250 | 2600 | 3100 |
| 6%   | 2000 | 2400 | 2900 |
| 6.5% |      | 2200 | 2600 |
| 7%   |      | 2000 | 2400 |
| 7.5% |      |      | 2300 |

1379  
1380  
1381  
1382  
1383  
1384  
1385  
1386  
1387  
1388  
1389  
1390  
1391  
1392  
1393  
1394  
1395  
1396  
1397  
1398  
1399  
1400  
1401  
1402  
1403  
1404  
1405  
1406  
1407  
1408  
1409  
1410  
1411  
1412  
1413  
1414  
1415  
1416  
1417  
1418  
1419  
1420  
1421  
1422  
1423  
1424  
1425

- **Analytical Methodology for Interim Analyses**

We plan one interim analysis after one-half of the children have been enrolled. We assumed a one-sided test with an  $\alpha=0.025$ , sample size=1900 (assuming 5% loss to follow-up in each of the arms), a Pocock design for early inferiority and O'Brien-Fleming for early non-inferiority stopping boundaries and a 1.5% relative difference failure rate between treatment (placebo) and control (3-day amoxicillin). The DSMB will consider recommending to stop the study prior to maximum enrollment if they determine early non-inferiority, early inferiority or safety concerns.

Safety concerns that, at a minimum, would necessitate stopping the study prior to maximum enrollment include, but are not limited to: a death in the placebo arm with a relationship to study product, overall treatment failure rate in excess of 20% of the enrolled population thus far (once at least 100 children have been enrolled), and a significant difference in SAE prevalence in one arm as compared to the other. The DSMB may require additional, more conservative rules for stopping the study to ensure participant safety.

Details of the sequential monitoring plan will be finalized in collaboration with the DSMB and provided in the Statistical Analysis Plan (SAP).

- **Analytical Methodology for Final Analyses**

We expect the project to produce evidence for fast-breathing pneumonia that supports that placebo treatment is non-inferior to 3 days of amoxicillin DT treatment.

We anticipate that some children may not return for their scheduled follow-up visits if no specific measures are taken to encourage more complete follow-up. In addition to appointment reminders and counseling caregivers on the importance of completing follow-up, study staff will provide incentives and transportation costs to minimize missing outcome data. For those children who do not return for their scheduled follow-up in-person visits, study staff will conduct home visits the next day to assess the outcome. Even with these measures in place, we have estimated the loss to follow-up to be 5% in this study. Children lost to follow-up cannot be classified as improved or treatment failures at the missed visit. We will use multiple imputations for any missing outcome data and perform sensitivity analyses to assess how our results might change if the imputation assumptions are changed in a reasonable way, informing the robustness of the primary analysis result. We will perform complete case analysis as one form of sensitivity analysis. The imputations will be performed separately for each treatment group and cohort using multiple (20) hotdeck imputations and adherence information as well as child's age, gender, literacy status of the caregiver, and number of children in the household.

For the primary outcome, we will estimate the difference in failure rate between the placebo and the 3-day amoxicillin DT treatment groups (after adjustment for age, 2-11 months or 12-59 months) and calculate a 95% CI. The placebo treatment will be considered non-inferior to the amoxicillin DT treatment if the upper level of the 95% confidence interval (CI) excludes a relative increase in failure rate of 50% (factor of 1.5).

To address potential misclassification of eligibility and outcome, we plan to include sub-studies to validate eligibility and outcome in 10% of randomly selected children in the study. For more details on potential misclassification and associated analyses, refer to the SAP.

## **RESULT PRESENTATION**

1426 The results of this research will be primarily presented through at least one published manuscript with detailed  
1427 description of the background, methods, results, and conclusion. The specific format and details of this manuscript  
1428 will be in accordance with the requirements of the publishing journal, but is expected to include tables describing the  
1429 baseline characteristics of study participants and the differences between randomization arms for each study  
1430 endpoint.

## 1431 **DISSEMINATION OF RESULTS**

1434 The results of this study will be published collaboratively by investigators at Save the Children Federation, Save the  
1435 Children International, University of North Carolina Project, Lilongwe Trust Medical Relief Fund, the University of  
1436 Washington, the University of Malawi, and the Ministry of Health in peer-reviewed journals. Study findings will be  
1437 presented to the Malawi MOH Senior Management and hospital staff at the study site. Co-investigators plan on  
1438 attending at least one international conference to disseminate the findings of the study.

## 1439 **ETHICAL CONSIDERATIONS AND CONSENT**

### 1440 **• Principles for Clinical Research**

1443 This clinical trial will be conducted in compliance with the protocol, International Conference on Harmonization  
1444 Good Clinical Practice E6 (ICH-GCP), and all applicable regulatory requirements and Institutional Review  
1445 Boards/Independent Ethics Committee (IRB/IEC) reviews. All study staff will be trained and certified in the  
1446 protection of human subjects.

1448 Additionally, the protocol team has consulted both the Declaration of Helsinki and the Belmont Report, two  
1449 cornerstones of ethical principles in human research, while designing this study. The Declaration of Helsinki advises  
1450 it may be permissible to use less than the standard of care or best proven treatment (e.g., placebo) in certain  
1451 situations, but that researchers must ensure that patients “will not be subject to additional risks of serious or  
1452 irreversible harm as a result of not receiving the best proven intervention. Extreme care must be taken to avoid abuse  
1453 of this option.”<sup>[47]</sup> The Belmont Report emphasizes finding an appropriate balance between the risks and benefits in  
1454 research.<sup>[48]</sup> In this study, minimizing the risks to participating children is paramount. Participant safety will be  
1455 treated as the number one priority through the research, evidenced by a robust safety net for monitoring children in  
1456 the study, promptly identifying children with treatment failure and getting them the treatment they need to recover;  
1457 extensive tracing efforts to ensure children do not “slip through the cracks;” and stopping rules that account for a  
1458 single death in the placebo arm as well as potential safety concerns such as disparate rates of SAEs or higher-than-  
1459 expected rates of treatment failure.

### 1461 **• Institutional Review Boards (IRBs) and Independent Ethics Committees (IECs)**

1463 The IRB and IEC of record for this clinical trial are the Western Institutional Review Board (WIRB) and the  
1464 University of Malawi College of Medicine Research and Ethics Committee (COMREC). A copy of the protocol,  
1465 proposed informed consent forms, other written participant information, and any proposed advertising material will  
1466 be submitted to both WIRB and COMREC for written approval. The investigators must submit and, where  
1467 necessary, obtain approval from the IRB/IEC for all subsequent protocol amendments and changes to the informed  
1468 consent document. The investigators will notify the IRB/IEC of SAEs according to the IRB/IEC requirements. The  
1469 Sponsor, CRO, and study operations partner (University of North Carolina Project, Lilongwe Trust Medical Relief  
1470 Fund) are responsible for assuring that this protocol and the associated informed consent documents and study-  
1471 related documents are approved by WIRB and COMREC prior to implementation of the protocol. Any amendments  
1472 to the protocol, informed consents, or other study-related documents must be approved by the IRB/IEC prior to  
1473 implementation. The study will be conducted in full compliance with the protocol. Any deviations from or violations  
1474 of the protocol will be documented and submitted to the IRB/IEC by investigators as required. The protocol will not  
1475 be amended without prior written approval by the PI and Sponsor.

### 1477 **• Informed Consent**

1478

1479 In obtaining and documenting informed consent, the site investigators and their designees will comply with  
1480 applicable local and domestic regulatory requirements and will adhere to GCP and to the ethical principles that have  
1481 their origin in the Declaration of Helsinki. This clinical trial will have an informed consent form (ICF) for screening  
1482 and an ICF for enrollment developed for local use that are in accordance with all applicable regulations. Both an  
1483 English and Chichewa version of the ICFs will be reviewed and approved by the IRB/IEC of record before use with  
1484 participants. The consent forms will include the purpose of the study, the investigational products to be  
1485 administered, a description of the procedures to be followed and the risks and benefits of participation. The informed  
1486 consent process will give individuals all of the relevant information they need to decide whether to participate, or to  
1487 continue participation, in this study. Potential research participants' caregivers will be permitted to ask questions and  
1488 to exchange information freely with the study team. If the caregiver providing consent is illiterate, an independent  
1489 witness will be present to verify to the caregiver that all the information read aloud is contained in the ICF. In this  
1490 instance, both the caregiver and witness will sign the ICF.

1491  
1492 Before a child begins participation in the study, it is the site investigators' responsibility to ensure that informed  
1493 consent is obtained from a LAR after adequate explanation of the aims, methods, and potential risks and benefits of  
1494 the study. The study staff obtaining consent will also sign and date the ICF. A signed and dated copy of the consent  
1495 form will be given to the participant's caregiver and this will be documented in the child's record.

1496  
1497 • **Risks to Participants**

1498  
1499 ○ Randomization arms

1500 This is a randomized trial that is investigating the effectiveness of no treatment with oral amoxicillin DT  
1501 for pneumonia. It is possible that placebo and amoxicillin are not equivalent in the management of fast-  
1502 breathing pneumonia and that children receiving placebo could suffer a higher treatment failure rate, with  
1503 an increased risk of AEs, hospitalization or death. Those children in the amoxicillin arm may have received  
1504 antibiotics that were unnecessary, exposing them to the potential risks of medication side effects or other  
1505 microbiota and immune system effects.

1506  
1507 ○ Coercion

1508 Caregivers may feel coerced to enroll in the study in order to receive care for their child within a research  
1509 setting, which may be perceived as of a higher quality than the standard of care.

1510  
1511 ○ Specimen Collection

1512 The study involves blood specimen sampling at screening. Phlebotomy can cause pain and bruising at or  
1513 around the blood draw site.

1514  
1515 ○ Medical Management

1516 Participation in the study has the potential to compromise care for hospitalized children, if study procedures  
1517 are prioritized above urgent clinical care for acute infections.

1518 • **Protection against Risks**

1519  
1520 ○ Randomization arms

1521 In order to minimize the risk of AEs, treatment failure, hospitalization, and death, eligibility criteria for this  
1522 study have been carefully selected and a robust safety monitoring scheme is in place. The children with  
1523 pneumonia most at risk of treatment failure and/or death will be excluded from this study, including those  
1524 with WHO IMCI danger signs, severe respiratory distress, HIV infection or exposure, and severe acute  
1525 malnutrition. Safety monitoring for this study includes frequent clinical examination at study visits for the  
1526 first four days, outcome assessment and a clinician on call via an emergency hotline for the first fourteen  
1527 days, treatment and tracking of all AEs and SAEs, and an external DSMB for regular review of cumulative  
1528 safety and study conduct data. All AEs and SAEs will receive prompt clinical care, as appropriate. Refer to  
1529 Section 4.10 of this protocol for more detail on the study's Safety Assessments and Reporting procedures.

1530  
1531 ○ Coercion

1532 In order to minimize the risk of coercion, study staff will not be recruiting participants directly. Instead,  
1533 OPD clinicians will inform caregivers about the study and refer only those who are interested. During the



1534 informed consent process, study staff will emphasize that the child will receive medical care whether  
1535 enrolled in the study or not.

1536  
1537 ○ Specimen Collection  
1538 In order to minimizing the risks associated with phlebotomy, all study staff who will be collecting  
1539 specimens from children in the study will be trained in the appropriate procedures and supervised  
1540 accordingly.

1541  
1542 ○ Medical Management  
1543 In order to minimize the possibility that participation in this trial will interfere with the medical  
1544 management of children with pneumonia at KCH, study staff will have the primary responsibility for the  
1545 clinical management of hospitalized children. Hospitalized children (e.g., those under 6 months of age  
1546 during the initial overnight admission) will be treated and managed by study staff in accordance with  
1547 standard procedures. Study staff will be informed about any decisions regarding treatment failure and  
1548 changing antibiotic regimens made by KCH staff. The study is prepared to hire additional staff as necessary  
1549 to avoid overburdening the KCH system. Please refer to Section 4.6 Study Procedures for further  
1550 description of Management of Study Participants During Hospitalization.

1551  
1552 ● **Benefits to Participants**

1553  
1554 Direct benefits to children in this trial include increased clinical supervision and care during the study period as  
1555 compared to alternatives not in a study setting. Frequent follow-up visits are not included as standard of care, so  
1556 participating children will benefit from monitoring for two weeks from the pneumonia episode, including phone  
1557 calls and home visits for missed follow-up. This level of supervision will make it more likely that a case of treatment  
1558 failure is identified and managed accordingly as compared to in a non-study setting. Additionally, participants’  
1559 caregivers will have access to a 24/7 hotline, answered by trained staff, which is not a part of standard of care.

1560  
1561 If this trial demonstrates non-inferiority of placebo, the results have great potential to inform and support national  
1562 and international guidelines for treatment for childhood pneumonia. For example, antibiotics could be prescribed  
1563 more appropriately, leading to reduced antibiotic resistance and large cost-savings for health systems.

1564  
1565 ● **Participant Confidentiality**

1566  
1567 The site investigators must ensure that the child’s confidentiality is maintained. Personal identifiers will not be  
1568 included in any study reports. All study records will be kept confidential to the extent provided by national and local  
1569 laws.

1570  
1571 All study procedures will be conducted to protect participant privacy and confidentiality to the fullest extent  
1572 possible. The study site will establish a standard operating procedure (SOP) for confidentiality protection that  
1573 includes both clinic and home visits and reflects the input of study staff and community representatives to identify  
1574 potential confidentiality issues and strategies to address them.

1575  
1576 ● **Participant Reimbursement**

1577  
1578 Travel reimbursement will be provided to caregivers to compensate them for the cost of transport for study visits.  
1579 Reimbursement will be approximately the local currency equivalent of US\$5.00 for each scheduled hospital-based  
1580 study visit, payable at the end of the visit. Reimbursement for interim study visits will be approximately the local  
1581 currency equivalent of US\$2.50. The reimbursement amount may be modified during the course of the study to  
1582 reflect potential changes in participant costs. The study consent form will list the minimum amount to be paid in the  
1583 local currency. Participants’ caregivers will not receive reimbursement for visits that occur while the child is  
1584 hospitalized to avoid disruptions in the hospital wards with other non-study patients.

1585  
1586 Participants’ caregivers will receive a phone card with airtime worth MK 100 on the carrier of their choice (either  
1587 AirTel or TNM) to cover any phone calls the caregiver may need to make to study staff during the course of the  
1588 study.

1589

1590 Study participants' caregivers will not be responsible for paying for study-related drugs, tests, or examinations.

1591

1592 • **Storage of Specimens**

1593

1594 Specimens collected during the course of this research will not be stored. Any leftover samples not consumed during  
1595 study-related diagnostic tests will be destroyed.

1596

1597 **POSSIBLE CONSTRAINTS**

1598

1599 Anticipated implementation challenges to the successful outcome of the study include:

1600 1. Ensuring quality and consistency of implementation at the trial site. We plan to provide standardized training,  
1601 supervision, and oversight to ensure quality and harmonized trial procedures. A CRO will be contracted to  
1602 provide additional oversight and monitoring of the site, as needed.

1603 2. Following up all children. Recognizing that some children may not come back for the follow-up visits, we plan  
1604 to include and train study staff to locate children who miss their follow-up appointments and conduct these  
1605 visits in the home. We will also ensure that study staff take the time to educate caregivers on the importance of  
1606 adhering to the treatment regimen and follow-up.

1607

1608 **REQUIREMENTS AND TRAINING**

1609

1610 See Appendix VII for a description of study requirements for study activities, including training for study personnel  
1611 and KCH staff.

1612

1613

1614 **REFERENCES**

1615

1616

1617 1. World Health Organization. (2014). *Integrated management of childhood illness: chart booklet*. Geneva: World  
1618 Health Organization.

1619 2. Hazir T, Y. N. (2006). Chest radiography in children aged 2-59 months diagnosed with non-severe pneumonia  
1620 as defined by World Health Organization: descriptive multi-centre study in Pakistan. *BMJ*, 333(7569), 629.

1621 3. Hazir T, Y. N. (2011). Comparison of oral amoxicillin with placebo for the treatment of World Health  
1622 Organization-defined nonsevere pneumonia in children aged 2-59 months: a multicentre, double-blind,  
1623 randomized, placebo-controlled trial in Pakistan. *Clinical Infectious Diseases*, 52(3), 293-300.

1624 4. Mulholland EK, E. S. (1992). Standardized diagnosis of pneumonia in developing countries. *Pediatric  
1625 Infectious Disease Journal*, 11, 77-81.

1626 5. World Health Organization. (2013). *Guidelines for the management of common illnesses with limited resources*.  
1627 Geneva: World Health Organization.

1628 6. English M, Scott JA. What is the future for global case management guidelines for common childhood  
1629 diseases? *PLoS Medicine*. 2008;5:e241-e241.

1630 7. K, M. (2014). New Diagnostics for Common Childhood Infections. *New England Journal of Medicine*, 370,  
1631 875-877.

1632 8. World Health Organization. (2014). *Integrated management of childhood illness: chart booklet*. Geneva: World  
1633 Health Organization.

1634 9. Grant GB, C. H. (2009). Recommendations for treatment of childhood non-severe pneumonia. *Lancet Infect  
1635 Dis*, 9, 185-196.

1636 10. Kabra SK, L. R. (2010). Antibiotics for community-acquired pneumonia in children. *Cochrane Database of  
1637 Systematic Reviews* (3).

1638 11. World Health Organization. (2012). *Recommendations for management of common childhood conditions:  
1639 evidence for technical update of pocket book recommendations: newborn conditions, dysentery, pneumonia,  
1640 oxygen use and delivery, common causes of fever, severe acute malnutrition and supportive care*. Geneva:  
1641 World Health Organization.

1642 12. World Health Organization. (2003 Sep 29-Oct 1). *Consultative Meeting to Review Evidence and Research  
1643 Priorities in the Management of Acute Respiratory Infections (ARI)*. Meeting Report, Chapter: "Non-severe

- 1644 pneumonia: ARI Case Management: Is Antimicrobial Therapy Necessary?." Geneva: World Health  
 1645 Organization.
- 1646 13. Thea DM, Vy N, Tran AT, Thula S, Qazi S, Fontaine O, and the NARIMA Study Group. A multicentre  
 1647 observational study of clinical outcome following amoxicillin treatment of non-severe acute respiratory tract  
 1648 infection (NARIMA). Global Congress on Lung Health, 32<sup>nd</sup> World Conference on International Union against  
 1649 Tuberculosis and Lung Disease (IUATLD), Paris, France, 1-4 November 2001. *Int J Tub and Lung Dis* 2001; 5  
 1650 (Suppl 1):S11.
- 1651 14. Thea, Donald. A multi-center prospective obseravational study of clinical outcome following amoxicillin  
 1652 treatment of non-severe acute respiratory tract infection. (2001). Unpublished final report.
- 1653 15. Hopstaken RM, Witbraad T, van Engelshoven JMA, et al. Inter-observer variation in the interpretation of chest  
 1654 radiographs for pneumonia in community acquired lower respiratory tract infections. *Clin Radiol* 2004; **59** :  
 1655 743–52.
- 1656 16. Davies HD, Wang EE, Manson D, et al. Reliability of the chest radiograph in the diagnosis of lower respiratory  
 1657 infections in young children. *Pediatr Infect Dis J* 1996; **15**: 600–04.
- 1658 17. Sadruddin S. (2014). Save the Children. Toronto. *Personal communication*.
- 1659 18. Bradley JS, et al. (2011). The management of community-acquired pneumonia in infants and children older than  
 1660 3 months of age: clinical practice guidelines by the Pediatric Infectious Diseases Society and the Infectious  
 1661 Diseases Society of America. *Clin Infect Dis*, 53(7): e25-76.
- 1662 19. Rambaud-Althaus, C, et al. (2015). Clinical features for diagnosis of pneumonia in children younger than 5  
 1663 years: a systematic review and meta-analysis. *Lancet Infect Dis*, 15: 439-500.
- 1664 20. Weerakkody Y, Paks M, et al. Lobar pneumonia. *Radiopaedia*. Accessed March 6, 2015.  
 1665 <http://radiopaedia.org/articles/lobar-pneumonia>
- 1666 21. Muro F, Mtove G, Mosha N, Wangai H, Harrison N, et al. (2015). Effect of context on respiratory rate  
 1667 measurement in identifying non-severe pneumonia in African children. *Trop Med Int Health*, doi:  
 1668 10.1111/tmi.12492
- 1669 22. D'Acremont V, K. M. (2014 Feb 27). Beyond malaria--causes of fever in outpatient Tanzanian children. *New*  
 1670 *England Journal of Medicine*, 370(9), 809-17.
- 1671 23. Hazir T, S. Q. (2004). Assessment and management of children aged 1-59 months presenting with wheeze, fast-  
 1672 breathing, and/or lower chest-indrawing; results of a multicentre descriptive study in Pakistan. *Archives of*  
 1673 *Disease in Childhood*, 89(11), 1049.
- 1674 24. Lochindarat S, S. Q. (2008). Are we adequately managing children with wheeze using the standard case  
 1675 management guidelines? *Journal of the Medical Association of Thailand*, 91(Suppl 3), 60-8.
- 1676 25. Lassi ZS, R. K. (2014). Antibiotic therapy versus no antibiotic therapy for children aged two to 59 months with  
 1677 WHO-defined non-severe pneumonia and wheeze. *Cochrane Database of Systematic Reviews*, (5).
- 1678 26. Spurling GKP, J. D. (2011). Antibiotics for bronchiolitis in children. *Cochrane Database of Systematic*  
 1679 *Reviews*, (6).
- 1680 27. Hazir T, N. Y. (2011 Feb 1). Comparison of oral amoxicillin with placebo for the treatment of world health  
 1681 organization-defined nonsevere pneumonia in children aged 2-59 months: a multicenter, double-blind,  
 1682 randomized, placebo-controlled trial in Pakistan. *Clinical Infectious Diseases*, 52(3), 293-300.
- 1683 28. Low DE, P. M. (2004 Mar). Optimizing antibacterial therapy for community-acquired respiratory tract  
 1684 infectionsin children in an era of bacterial resistance. *Clin Pediatr (Phila)*, 43(2), 135-51.
- 1685 29. Ginsburg AS, L. T. (2013 Dec). Antibiotic non-susceptibility among Streptococcus pneumoniae and  
 1686 Haemophilus influenzae isolates identified in African cohorts: a meta-analysis of three decades of published  
 1687 studies. *Int J Antimicrob Agents*, 42(6), 482-91.
- 1688 30. Neu HC. (1992). The crisis in antibiotic resistance. *Science*, 257(5073), 1064-1073.
- 1689 31. Makoka MH, Miller WC, Hoffman IF, et al. (2012). Bacterial infections in Lilongwe, Malawi: aetiology and  
 1690 antibiotic resistance. *BMC Infectious Diseases*. 12:67.
- 1691 32. Cornick JE, Harris SR, Perry CM, et al.(2014). Genomic identification of a novel co-trimoxazole resistance  
 1692 genotype and its prevalence amongst Streptococcus pneumonia in Malawi. *J Antimicrob Chemother*. 69(2):368-  
 1693 74.
- 1694 33. UN Commission on Life-Saving Commodities for Women and Children. (2012 Sep). *Commissioner's Report*.  
 1695 New York: UN.
- 1696 34. Rizal A, J. B. (2010). Acute respiratory infection: Boston university's collaborative research work in the last  
 1697 decade. *Indian Pediatrics* 47(1), 19-24.
- 1698 35. Hussain, H., H. Waters, et al. (2006). "The cost of treatment for child pneumonias and meningitis in the  
 1699 Northern Areas of Pakistan." *Int J Health Plann Manage* 21(3): 229-38.

1700 36. Edejer, T. T., M. Aikins, et al. (2005). "Cost effectiveness analysis of strategies for child health in developing  
1701 countries." *BMJ* **331**(7526): 1177.

1702 37. Side Effects: List amoxicillin side effects by likelihood and severity. *WebMD*. Accessed March 2, 2015.  
1703 <http://www.webmd.com/drugs/2/drug-1531-3295/amoxicillin-oral/amoxicillin-oral/details/list-sideeffects>

1704 38. Peders J, et al. (2006). Factors influencing the composition of the intestinal microbiota in early infancy.  
1705 *Pediatrics*, 118(2): 511-21.

1706 39. Buffie CG, et al. (2011). Profound alterations of intestinal microbiota following a single dose of clindamycin  
1707 results in sustained susceptibility to *Clostridium difficile*-induced colitis. *Infect Immun*, 80(1): 62-73.

1708 40. Bailey MT. (2012). The contributing role of the intestinal microbiota in stressor-induced increased in  
1709 susceptibility to enteric infection and systemic immunomodulation. *Horm Behav*, 62(3): 286-94.

1710 \

1711 41. Prasad V, et al. (2013). A decade of reversal: an analysis of 146 contradicted medical practices. *Mayo Clin*  
1712 *Proc*, 88(8): 790-798.

1713 42. Venekamp RP, Sanders SL, Glasziou PP, et al. (2015). Antibiotics for acute otitis media in children. *Cochrane*  
1714 *Database of Systematic Reviews*, (6).

1715 43. Alves Galvao MG, et al. (2014). Antibiotics for preventing suppurative complications from undifferentiated  
1716 acute respiratory infections in children under five years of age. *Cochrane Database of Systematic Reviews* (2).

1717 44. United Nations Development Programme (UNDP). (2014). *Country Profiles, Malawi*. UNDP.

1718 45. F, D. (2009). Epidemiology of Malaria in Malawi. In B. C. Geubbels E, *The Epidemiology of Malawi*.  
1719 University of Malawi: Division of Community Health, College of Medicine.

1720 46. United Nations AIDS Program (UNAIDS). (2014). *Country Progress Reports, Malawi*. UNAIDS.

1721 47. World Medical Association (WMA). (October 2013). *Declaration of Helsinki: Ethical Principles for Medical*  
1722 *Research Involving Human Subjects*. Fortaleza, Brazil: WMA General Assembly.

1723 48. Department of Health, Education, and Welfare. (April 18, 1979). *Ethical Principles and Guidelines for the*  
1724 *Protection of Human Subjects of Research*. Washington, DC: The National Commission for the Protection of  
1725 Human Subjects of Biomedical and Behavioral Research.

1726

1727

1728

1729

1730

1731

1732  
1733  
1734  
1735

**PROTOCOL APPENDICES**

**APPENDIX I: SCHEDULE OF STUDY VISITS AND EVALUATIONS**

|                         | Screening | Enrollment (Day 1) | Day 2 | Day 3 | Day 4 | Day 14 | Interim visit(s) |
|-------------------------|-----------|--------------------|-------|-------|-------|--------|------------------|
| Informed Consent        | ✓         | ✓                  |       |       |       |        |                  |
| Comprehension Checklist |           | ✓                  |       |       |       |        |                  |
| Participant ID          | ✓         | ✓                  | ✓     | ✓     | ✓     | ✓      | ✓                |
| Eligibility Assessment  | ✓         | ✓                  |       |       |       |        |                  |
| Demographics            | ✓         | ✓                  |       |       |       |        |                  |
| Locator Information     | ✓         | ✓                  | ✓     | ✓     | ✓     | ✓      | ✓                |
| Randomization           |           | ✓                  |       |       |       |        |                  |
| Reimbursement           |           | ✓                  | ✓     | ✓     | ✓     | ✓      | ✓                |
| Schedule Next Visit     | ✓         | ✓                  | ✓     | ✓     | ✓     |        |                  |
| Medical History         | ✓         | ✓                  | ✓     | ✓     | ✓     | ✓      | ✓                |
| Targeted Physical Exam  | ✓         | ✓                  | ✓     | ✓     | ✓     | ✓      | ✓                |

1736  
1737  
1738  
1739

**APPENDIX II: SAMPLE COLLECTION AND LABORATORY EVALUATIONS**

| Specimen for Diagnostic | Screening | Enrollment (Day 1) | Day 2 | Day 3 | Day 4 | Day 14 | Laboratory |
|-------------------------|-----------|--------------------|-------|-------|-------|--------|------------|
| HIV test                | ✓         |                    |       |       |       |        | Study site |
| Anemia test             | ✓         |                    |       |       |       |        |            |
| Malaria test            | ✓         |                    |       |       |       |        |            |

1740

1741 **APPENDIX III: SAMPLE SIZE CALCULATIONS**

1742  
1743  
1744  
1745

Graphical representation of required total sample sizes (mostly rounded to full 100s) for lower failure rates in the amoxicillin DT group to achieve 80%, 85% and 90% power for the alternative of exactly the same failure rates in the two groups (ITIP1).

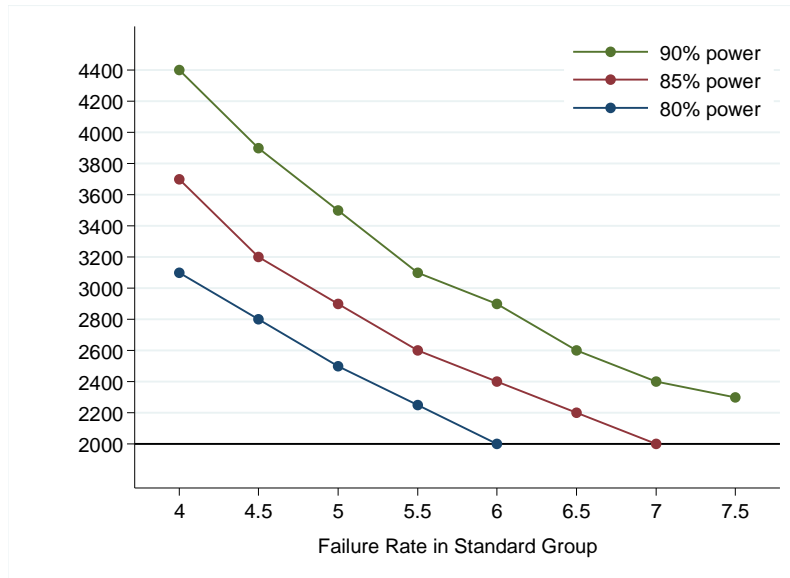

1746  
1747  
1748

**APPENDIX IV: STUDY REQUIREMENTS AND TRAINING**

1749  
1750  
1751

Additional study requirements not already described in the protocol are summarized below.

1752  
1753

- **Personnel**

1754  
1755  
1756  
1757  
1758  
1759  
1760  
1761  
1762  
1763  
1764  
1765  
1766  
1767  
1768  
1769  
1770  
1771  
1772  
1773

The study team on-the-ground will consist of full-time employees in the following capacities:

- Study coordinator: clinician who will oversee daily study operations and monitor the safety of participants
- Study medical officers/clinical officers: clinicians whose daily work will involve screening potential study participants, enrolling children into the study, performing clinical assessments during observation periods, clinically managing hospitalized study participants, and conducting the safety monitoring and reporting for adverse events in the study patients.
- Pharmacists: receive, account for, prepare, and distribute study product; train study staff on study product administration procedures
- Data manager: maintain study databases with quality control and quality assurance procedures; prepare regular reports of ongoing study activities and data
- Data officers/assistants: scan data collected on paper forms for entry into electronic database(s); maintain copies of study documents as needed, prepare study documents and ensure all in correct format for study participant files, perform quality control checks in the study participants' CRF's.
- Study nurses: perform screening, enrollment, follow-up and interim study visit procedures; conduct informed consent process; conduct all home visits and study retention efforts
- HTC counselors: perform HIV test pre-counseling, testing and post-test counseling per study protocol and Malawi national guidelines.
- Fieldworkers: perform home follow up visits.

1774  
1775  
1776  
1777  
1778

In addition to the full-time staff, the project will use the expertise of additional Save the Children (SC) personnel to assist with meeting study goals. A portion of SC staff's time will be for operational and grant management services, which will provide a range of support activities to the project such as accounting, human resources management, information technology, administration and audit services.

1779 Government staff at the study site hospital will also be engaged with this study. KCH service providers will  
1780 be responsible for recruiting of study participants at KCH or BDH and managing participants' care while in  
1781 the hospital.  
1782

1783 • **Training**  
1784

1785 All study staff will be trained in the Protection of Human Subjects prior to any interactions with study  
1786 participants. Additionally, before the study starts, all study staff will attend an extensive 5-day study-  
1787 specific training to review all study procedures, including the study protocol, SOPs, data collection tools,  
1788 informed consent process, reporting requirements, and safety monitoring. Refresher trainings on the  
1789 identification of pneumonia will be scheduled at least once per year and will include updates from the study  
1790 monitor reports. Trainings will be conducted by a Sponsor representative, representative of the study CRO,  
1791 or other qualified clinician, as appropriate for the training material.  
1792

1793 Government staff at KCH and BDH will be sensitized to this study and will receive at least one day of  
1794 training on the identification of pneumonia and study-specific procedures and documentation prior to the  
1795 study start. Refresher trainings will be held periodically, at least once every year.  
1796

1797 • **Supplies**  
1798

1799 Supplies for this study include the following:

- 1800 ○ Laptops for study staff
- 1801 ○ Printer
- 1802 ○ Photocopier
- 1803 ○ Respiratory rate counters
- 1804 ○ Portable pulse oximeter
- 1805 ○ Scale
- 1806 ○ Height board
- 1807 ○ Malaria RDT kits
- 1808 ○ Office furniture
- 1809 ○ Partitions/privacy screens for the study clinic
- 1810 ○ Communication equipment such as cellphone accessories, airtime, and internet sticks
- 1811 ○ Standard office supplies, including binders, paper, pens
- 1812

1813 • **Transportation**  
1814

1815 The study will obtain multiple motorcycles for use by the study retention team to conduct home visits after  
1816 a participant misses a scheduled study visit. Study participants will be expected to provide their own  
1817 transportation to study visits at KCH, but will receive a travel reimbursement.  
1818

1819 • **Space**  
1820

1821 The study clinic for out-patient screening and enrollment will be located in the Pediatric Department of  
1822 KCH or BDH. The study clinic for follow-up and interim visits will be located in the Pediatric Department  
1823 of KCH. The hospital has provided the study with a private room for study visits and other study-related  
1824 activities. Additional office space for data management and the study coordinator will be provided at a  
1825 separate location in Lilongwe.  
1826

1827 **APPENDIX V: STUDY SENSITIZATION/RECRUITMENT SCRIPT**  
1828

1829 **Instructions:** This script is to be used by Kamuzu Central Hospital and Bwaila District Hospital staff in the  
1830 Paediatric Outpatient Department after the initial triage and intake of a presenting child. This content should be  
1831 presented to caregivers of children who are between 2 and 59 months of age and have cough or difficult  
1832 breathing.  
1833

1834 **Script:** “There are two ongoing research studies for children with pneumonia and your child may be eligible to  
1835 participate in one of them. The studies are investigating different treatment regimens for childhood pneumonia,  
1836 seeing if less antibiotic use is as effective for curing pneumonia. If you are interested in learning more about  
1837 these studies, I can let the study staff know that it is okay to contact you. If you aren’t interested in the studies,  
1838 that is fine and no one from the study will contact you about them. Your decision to participate in a study will  
1839 not affect the medical care that your child receives in the hospital. Are you interested in learning more about  
1840 the studies?”

1841  
1842 **Prompts:** If families ask other questions about the study, including procedures, risks, or benefits, they should  
1843 be referred to study staff.

1844  
1845  
1846  
1847  
1848
